# Supplementary material for: Telomerase biogenesis requires a novel Mex67 function and a cytoplasmic association with the Sm7 complex
Source: eLife. 2020 Oct 23;9:e60000. doi: 10.7554/eLife.60000 (PMC7644208; doi:10.7554/eLife.60000)
Supplement: Figure 1—source data 1. [file elife-60000-fig1-data1.xlsx]

## Sheet: Fig. 1D
Figure 1D. Quantification of the Southern blot shown in C.
wild type (YV349, YV352)
N1	Name	band	background		N2	Name	band	background		N3	Name	band	background		N4	Name	band	background		N5	Name	band	background
	TLC1 0h	226779	52579.2			TLC1 0h	206256	70469.4			TLC1 0h	644001	156846			TLC1 0h	246566	54465.2			TLC1 0h	177189	41857
	TLC1 0.5h	221806	63502.3			TLC1 0.5h	146946	73417.6			TLC1 0.5h	170068	64923.7			TLC1 0.5h	226721	61844.2			TLC1 0.5h	118859	39017.3
	TLC1 1h	171060	54921			TLC1 1h	114735	61511.8			TLC1 1h	112943	54232.9			TLC1 1h	156246	46876.2			TLC1 1h	80131	25761.7
	TLC1 2h	91120	42842.9			TLC1 2h	86314.5	60613.5			TLC1 2h	75727.3	45407.7			TLC1 2h	44379.9	22312.1			TLC1 2h	61356.3	24864.8
	TLC1 3h	57614.7	31432.3			TLC1 3h	64685	51924.8			TLC1 3h	60939.6	42621.2			TLC1 3h	22821.4	11580.6			TLC1 3h	47360.4	17780.4
	TLC1 4h	26376.8	17468.6			TLC1 4h	95764.2	77675.5			TLC1 4h	56421.7	42658			TLC1 4h	19561.2	12671.3			TLC1 4h	21181.3	9622.21
	TLC1 (+)	21567.7	17117			TLC1 8h	60429.4	52398.8			TLC1 8h	54654.3	43435.4			TLC1 8h	17276.6	12789.1			TLC1 8h	11282.1	7329.55
	TLC1-MS2 0h	46311.2	20389.7			TLC1 16h	64023.6	56678.7			TLC1 16h	53469.9	42784.1			TLC1 16h	27468.3	18185.5			TLC1 16h	13364.3	10148.7
	TLC1-MS2 0.5h	161619	47998.9			TLC1 (+)	50723.1	46039.6			TLC1 (+)	68317.2	53720.6			TLC1 (+)	16575.6	10734.8			TLC1 (+)	10456.9	7996.41
	TLC1-MS2 1h	274214	74019			TLC1-MS2 0h	44873.8	43227.2			TLC1-MS2 0h	66135.1	56396.9			TLC1-MS2 0h	20271.1	20249.7			TLC1-MS2 0h
	TLC1-MS2 2h	391061	90541.4			TLC1-MS2 0.5h	114409	55474.1			TLC1-MS2 0.5h	127905	54031.5			TLC1-MS2 0.5h	172087	41912.2			TLC1-MS2 0.5h
	TLC1-MS2 3h	336593	68025.8			TLC1-MS2 1h	153430	57355.6			TLC1-MS2 1h	165185	54210			TLC1-MS2 1h	291599	62754.5			TLC1-MS2 1h	156508	35309
	TLC1-MS2 4h	202997	40244.3			TLC1-MS2 2h	225180	70555.7			TLC1-MS2 2h	198228	60572.8			TLC1-MS2 2h					TLC1-MS2 2h	195213	39841.6
	TLC1-MS2 (+)	257359	33104.1			TLC1-MS2 3h	241946	69395.1			TLC1-MS2 3h	206490	69665.8			TLC1-MS2 3h	214671	31953.2			TLC1-MS2 3h	232627	40856.5
	CEN4 0h	67414.1	31774.9			TLC1-MS2 4h	797003	102139			TLC1-MS2 4h	275087	68133.1			TLC1-MS2 4h					TLC1-MS2 4h	161628	27080.6
	CEN4 0.5h	101789	42701.7			TLC1-MS2 8h	360219	98929.9			TLC1-MS2 8h	300289	68771.9			TLC1-MS2 8h					TLC1-MS2 8h	179524	28612.3
	CEN4 1h	134039	48050.1			TLC1-MS2 16h	588800	101224			TLC1-MS2 16h	334478	76256.6			TLC1-MS2 16h					TLC1-MS2 16h	256349	36090.3
	CEN4 2h	134001	45324.1			TLC1-MS2 (+)	266391	70314			TLC1-MS2 (+)	558318	100865			TLC1-MS2 (+)	205793	25337.8			TLC1-MS2 (+)	197105	31978.9
	CEN4 3h	95077.7	38462			CEN4 0h	88967.8	54784.7			CEN4 0h	255785	99155.5			CEN4 0h	90109.7	35575.8			CEN4 0h	64276.9	23778.8
	CEN4 4h	66602.1	23575.9			CEN4 0.5h	125091	70970.1			CEN4 0.5h	138450	66312.9			CEN4 0.5h	140928	52860.3			CEN4 0.5h	72567.5	32412.1
	CEN4 (+)	56225.2	24803.3			CEN4 1h	115386	64859			CEN4 1h	142857	65800.8			CEN4 1h	151136	54583.8			CEN4 1h	73386.9	25043.6
						CEN4 2h	130696	70619.7			CEN4 2h	125053	55539.4			CEN4 2h	86748.2	31941.6			CEN4 2h	72564.5	27564.7
						CEN4 3h	129299	66805.5			CEN4 3h	147448	59474.8			CEN4 3h	70812.2	22215.5			CEN4 3h	78840.7	26007.3
						CEN4 4h	303552	110022			CEN4 4h	151308	59679.7			CEN4 4h	81599.8	25924.2			CEN4 4h	48216.8	15358.8
						CEN4 8h	154732	72751.8			CEN4 8h	161519	64768.7			CEN4 8h	81216.1	24645.9			CEN4 8h	56208.3	15343.2
						CEN4 16h	217378	83214			CEN4 16h	174937	65905.5			CEN4 16h	106539	35369.6			CEN4 16h	82023.8	22891.8
						CEN4 (+)	105016	56066.6			CEN4 (+)	265077	90028.3			CEN4 (+)	69010.4	22423.3			CEN4 (+)	55266.6	16328.5

## Sheet: Fig. 1F
Figure 1F. Quantification of the northern blot shown in E.
wild type (YV349, YV352)
N1	Name	band	background		N2	Name	band	background		N3	Name	band	background
	TLC1 0h	70676.1	17522.6			TLC1 0h	42081.5	9380.29			TLC1 0h	116221	16945.8
	TLC1 0.5h	62531.8	12807.9			TLC1 0.5h	39430.3	9801.22			TLC1 0.5h	107499	18877.4
	TLC1 1h	51317.5	11453.1			TLC1 1h	40228.2	11967.2			TLC1 1h	117314	23987.9
	TLC1 2h	22911.2	5747.13			TLC1 2h	31906.6	9602.9			TLC1 2h	86081.6	20325
	TLC1 3h	21166.2	6333.18			TLC1 3h	17325	5084.25			TLC1 3h	47554.6	11208.7
	TLC1 4h	12932	4686.86			TLC1 4h	12825.2	3943.6			TLC1 4h	33925	9004.06
	TLC1 8h	5937.05	4796.91			TLC1 8h	15224.3	7290.75			TLC1 8h	36414.6	14882.2
	TLC1 16h	5058.68	4196.88			TLC1 16h	16786.6	14370.1			TLC1 16h	35504	29384.1
	TLC1 (+)	7609.16	6680.47			TLC1 (+)	4904.6	3855			TLC1 (+)	13576	11646
	TLC1-MS2 0h	9347.63	5773.92			TLC1-MS2 0h	11195.6	5573.2			TLC1-MS2 0h	29058.5	13695.8
	TLC1-MS2 0.5h	9963.84	5540.8			TLC1-MS2 0.5h	13188.4	6316.12			TLC1-MS2 0.5h	36180.8	16876.8
	TLC1-MS2 1h	10981.6	5238.91			TLC1-MS2 1h	15873.5	7858.05			TLC1-MS2 1h	40531.1	17833
	TLC1-MS2 2h	13897.6	5126.06			TLC1-MS2 2h	18836.1	8470.1			TLC1-MS2 2h	65210.6	18776
	TLC1-MS2 3h	18859	6468.62			TLC1-MS2 3h	18147.6	6850.29			TLC1-MS2 3h	59440.6	16025.5
	TLC1-MS2 4h	24253.4	6201.36			TLC1-MS2 4h	24537.3	7302.4			TLC1-MS2 4h	76541.5	16887.5
	TLC1-MS2 8h	20127.7	6403.01			TLC1-MS2 8h	48858.7	10031.3			TLC1-MS2 8h	147140	23038
	TLC1-MS2 16h	24273	6129.36			TLC1-MS2 16h	51640.7	5536.83			TLC1-MS2 16h	171101	11646.5
	TLC1-MS2 (+)	38585.8	8505.74			TLC1-MS2 (+)	25985.9	6681.93			TLC1-MS2 (+)	78830.9	17534.3
	U1 0h	134187	23134			U1 0h	68536.8	9753.87			U1 0h	16980.8	3224.4
	U1 0.5h	123122	18510.3			U1 0.5h	81441.4	15249.6			U1 0.5h	22728.8	5173.55
	U1 1h	117545	16977.9			U1 1h	100240	17036.9			U1 1h	26139.6	5572.82
	U1 2h	71418.4	12754.2			U1 2h	102178	18697.5			U1 2h	25818.7	5636.21
	U1 3h	83882.7	14146.6			U1 3h	72475.4	13619.1			U1 3h	17673.3	3816.98
	U1 4h	72640.9	12906.5			U1 4h	71944.3	12437.9			U1 4h	15829.6	2970.03
	U1 8h	53164.9	10511.7			U1 8h	142699	26672.7			U1 8h	30882.4	5175.22
	U1 16h	60643.3	11295.5			U1 16h	150762	36450.4			U1 16h	42361.5	16021.3
	U1 (+)	132020	17849.2			U1 (+)	63965.7	8076.58			U1 (+)	15478.4	3615.02

## Sheet: Fig. 1G
Figure 1G. RT-ddPCR quantification of untagged TLC1 and tagged TLC1-MS2 RNA transcripts following induction of recombination.
wild type (YV349, YV352)
Name	N	Sample	Concentration (copies/ul)	Poisson CI min (copies/ul)	Poisson CI max (copies/ul)	Applied Dilution Factor	Total Droplets	Positive Droplets	Negative Droplets
all TLC1 (ABA+B+)		NTC	0	0	0.206952	1	17033	0	17033
	N1	Wellinger 01 TC2 YV-N5 YV349 0h	87.6054	82.7046	92.5267	1	17043	1223	15820
		Wellinger 02 TC2 YV-N5 YV349 0.5h	106.951	101.446	112.483	1	16617	1444	15173
		Wellinger 03 TC2 YV-N5 YV349 1h	65.7111	61.3989	70.0393	1	16365	889	15476
		Wellinger 04 TC2 YV-N5 YV349 2h	79.4128	74.8231	84.0205	1	17557	1146	16411
		Wellinger 05 TC2 YV-N5 YV349 3h	70.2568	65.8179	74.7126	1	16543	959	15584
		Wellinger 06 TC2 YV-N5 YV349 4h	60.3631	56.3282	64.412	1	17135	857	16278
		Wellinger 07 TC2 YV-N5 YV349 8h	93.2679	88.2132	98.3444	1	17096	1303	15793
		Wellinger 08 TC2 YV-N5 YV349 16h	61.2576	57.2439	65.285	1	17581	892	16689
	N2	Wellinger 09 TC4 YV-N7 YV349 0h	109.184	103.705	114.687	1	17150	1520	15630
		Wellinger 10 TC4 YV-N7 YV349 0.5h	105.281	99.745	110.842	1	16168	1384	14784
		Wellinger 11 TC4 YV-N7 YV349 1h	98.6053	93.5738	103.658	1	18284	1470	16814
		Wellinger 12 TC4 YV-N7 YV349 2h	106.646	101.323	111.994	1	17724	1536	16188
		Wellinger 13 TC4 YV-N7 YV349 3h	49.655	46.0532	53.2678	1	17615	728	16887
		Wellinger 14 TC4 YV-N7 YV349 4h	56.4283	52.5625	60.3068	1	17424	816	16608
		Wellinger 15 TC4 YV-N7 YV349 8h	52.1014	48.3756	55.8389	1	17290	749	16541
		Wellinger 16 TC4 YV-N7 YV349 16h	75.1302	70.3888	79.8908	1	15534	961	14573
		Wellinger 17 TC6 YV-N9 YV359	110.644	105.028	116.287	1	16544	1485	15059
		Wellinger 18 TC6 YV-N9 YV360	1018.64	997.757	1039.91	1	16487	9551	6936
old TLC1 (AA+v2)		NTC	0	0	0.220729	1	15970	0	15970
	N1	Wellinger 01 TC2 YV-N5 YV349 0h	81.1339	76.0744	86.2154	1	14766	984	13782
		Wellinger 02 TC2 YV-N5 YV349 0.5h	70.7474	66.0603	75.4533	1	14941	872	14069
		Wellinger 03 TC2 YV-N5 YV349 1h	42.6077	38.9614	46.2652	1	14704	523	14181
		Wellinger 04 TC2 YV-N5 YV349 2h	29.6143	26.5157	32.721	1	14080	350	13730
		Wellinger 05 TC2 YV-N5 YV349 3h	11.5476	9.7596	13.3382	1	16381	160	16221
		Wellinger 06 TC2 YV-N5 YV349 4h	9.38965	7.72463	11.057	1	15347	122	15225
		Wellinger 07 TC2 YV-N5 YV349 8h	2.30396	1.58301	3.21684	1	15845	31	15814
		Wellinger 08 TC2 YV-N5 YV349 16h	0.145037	0.021972	0.464618	1	16224	2	16222
	N2	Wellinger 09 TC4 YV-N7 YV349 0h	95.4782	90.2536	100.726	1	16395	1278	15117
		Wellinger 10 TC4 YV-N7 YV349 0.5h	73.4576	68.699	78.2357	1	15067	912	14155
		Wellinger 11 TC4 YV-N7 YV349 1h	53.999	50.1222	57.8886	1	16562	743	15819
		Wellinger 12 TC4 YV-N7 YV349 2h	28.9859	26.028	31.9513	1	15121	368	14753
		Wellinger 13 TC4 YV-N7 YV349 3h	10.6527	8.94343	12.3644	1	16530	149	16381
		Wellinger 14 TC4 YV-N7 YV349 4h	4.89643	3.83427	6.13959	1	16854	70	16784
		Wellinger 15 TC4 YV-N7 YV349 8h	1.15383	0.674563	1.81967	1	16322	16	16306
		Wellinger 16 TC4 YV-N7 YV349 16h	0.276297	0.0833656	0.651542	1	17034	4	17030
		Wellinger 17 TC6 YV-N9 YV359	0	0	0.223076	1	15802	0	15802
		Wellinger 18 TC6 YV-N9 YV360	0.0724361	0.00304223	0.345995	1	16242	1	16241
new TLC1-MS2 (BB+)		NTC	0	0	0.190129	1	18540	0	18540
	N1	Wellinger 01 TC2 YV-N5 YV349 0h	0.657136	0.327142	1.15773	1	17908	10	17898
		Wellinger 02 TC2 YV-N5 YV349 0.5h	13.0973	11.2064	14.9913	1	16620	184	16436
		Wellinger 03 TC2 YV-N5 YV349 1h	15.2579	13.2833	17.2357	1	17772	229	17543
		Wellinger 04 TC2 YV-N5 YV349 2h	38.1225	34.9435	41.3101	1	17281	551	16730
		Wellinger 05 TC2 YV-N5 YV349 3h	51.5294	47.7944	55.2763	1	17011	729	16282
		Wellinger 06 TC2 YV-N5 YV349 4h	56.76	52.9159	60.6166	1	17728	835	16893
		Wellinger 07 TC2 YV-N5 YV349 8h	92.673	87.5677	97.8005	1	16647	1261	15386
		Wellinger 08 TC2 YV-N5 YV349 16h	66.4258	62.2394	70.6271	1	17560	964	16596
	N2	Wellinger 09 TC4 YV-N7 YV349 0h	0.522527	0.236546	0.978557	1	18016	8	18008
		Wellinger 10 TC4 YV-N7 YV349 0.5h	12.0246	10.1912	13.8608	1	16226	165	16061
		Wellinger 11 TC4 YV-N7 YV349 1h	32.6387	29.9312	35.3525	1	20357	557	19800
		Wellinger 12 TC4 YV-N7 YV349 2h	60.1086	56.243	63.987	1	18591	926	17665
		Wellinger 13 TC4 YV-N7 YV349 3h	38.7661	35.6577	41.8827	1	18387	596	17791
		Wellinger 14 TC4 YV-N7 YV349 4h	49.7475	46.2341	53.2715	1	18549	768	17781
		Wellinger 15 TC4 YV-N7 YV349 8h	51.3222	47.6423	55.0137	1	17453	745	16708
		Wellinger 16 TC4 YV-N7 YV349 16h	77.7784	73.3537	82.2198	1	18492	1183	17309
		Wellinger 17 TC6 YV-N9 YV359	111.663	106.201	117.151	1	17659	1599	16060
		Wellinger 18 TC6 YV-N9 YV360	1019.65	998.979	1040.69	1	16858	9772	7086
