# Supplementary material for: Telomerase biogenesis requires a novel Mex67 function and a cytoplasmic association with the Sm7 complex
Source: eLife. 2020 Oct 23;9:e60000. doi: 10.7554/eLife.60000 (PMC7644208; doi:10.7554/eLife.60000)
Supplement: Figure 2—source data 1. [file elife-60000-fig2-data1.xlsx]

## Sheet: Fig. 2B-E
Figure 2B. Average number of old and new TLC1 foci observed by smFISH following recombination induction.
Figure 2C. Relative fractions of old and new TLC1 foci observed by smFISH following recombination induction.
Figure 2D, E. Relative nuclear and cytoplasmic fractions of old (D) and new (E) TLC1 foci observed by smFISH following recombination induction.
N - nucleus
C - cytoplasm
wild type			0h						0.5 h						1 h						2 h						3 h						4 h						8 h						16 h
YV349, YV352			TLC1 (total)		MS2 (coloc)				TLC1 (total)		MS2 (coloc)				TLC1 (total)		MS2 (coloc)				TLC1 (total)		MS2 (coloc)				TLC1 (total)		MS2 (coloc)				TLC1 (total)		MS2 (coloc)				TLC1 (total)		MS2 (coloc)				TLC1 (total)		MS2 (coloc)
			N	C	N	C			N	C	N	C			N	C	N	C			N	C	N	C			N	C	N	C			N	C	N	C			N	C	N	C			N	C	N	C
		N1	7.5	2.5	0	0		N1	10	2	0	0		N1	3	2	0	0		N1	5	5	0	1		N1	4.5	6.5	2.5	2.5		N1	3.5	9.5	2	5		N1	5	4	5	2		N1	2	5	1.5	1.5
			5	0	0	0			5.5	0.5	0	0			7.5	1.5	0	0			3	3	3	3			3.5	3.5	0.5	3.5			1.5	1.5	1	0			5	0	5	0			3	2	2	1
			5	0	0	0			3	7	1	2			6	3	0	0			3.5	0.5	0	0			2.5	3.5	0.5	0.5			4	4	3.5	1.5			5.5	1.5	4.5	1.5			4.5	0.5	4.5	0.5
			4.5	2.5	0	0			6	0	0	0			5	3	0	0			4	2	3	1			2.5	0.5	0.5	0.5			6.5	7.5	5	5			4	1	1	1			5	4	4	4
			5	3	0	0			3	2	0	0			5	6	1.5	3.5			4	3	0	0			7	2	2	0			4.5	6.5	3	4			2	5	0	4			4	5	3	5
			2.5	1.5	0	0			7.5	3.5	0	3			4.5	4.5	0.5	0.5			2	3	0	0			3.5	3.5	0.5	3.5			8.5	4.5	2.5	2.5			7.5	2.5	7.5	1.5			5.5	0.5	3	0
			9	8	0	0			6.5	5.5	0	0			1	4	0	0			4	2	1	0			7	3	3	0			2	7	1	4			5	0	5	0			4	1	4	1
			5	2	0	0			6	4	0	0			4.5	2.5	0	0			2	3	0	1			4.5	6.5	2.5	5.5			4.5	5.5	3.5	3.5			7	2	6	1			3	0	3	0
			9	8	0	0			5	3	0	0			6.5	0.5	0	0			6	2	3.5	1.5			6.5	3.5	5.5	3.5			4.5	3.5	1	0			5	3	5	3			6	5	5.5	4.5
			10	5	0	0			5	5	0	0			4	0	2	0			5	2	2	2			5.5	6.5	3	2			3	6	3	6			3	1	3	1			3.5	2.5	3.5	2.5
			3	3	0	0			2.5	3.5	0	2			2.5	4.5	0	0			2	7	0.5	4.5			4.5	5.5	1.5	5.5			3	3	0	0			5.5	7.5	5	4			4.5	3.5	4.5	3.5
			3	3	0	0			2.5	3.5	0	0			0.5	2.5	0.5	1.5			5	4	3.5	2.5			2	2	0	0			1.5	2.5	1.5	0.5			3.5	5.5	2.5	3.5			8.5	2.5	8.5	1.5
			5	4	0	0			3.5	2.5	0	0			4	6	0	2			7.5	5.5	3	2			4	1	2	1			3.5	2.5	2	1			5.5	4.5	5	3			6	2	6	1
			7	6	0	0			6.5	0.5	0	0			6	6	2.5	1.5			9	1	0	0			1	9	1	1			3	7	3	4			4.5	3.5	4.5	3.5			5.5	2.5	5.5	2.5
			3.5	3.5	0	0			5	1	0	0			4.5	1.5	2.5	1.5			5.5	3.5	2	3			2.5	3.5	0.5	0.5			4.5	6.5	4.5	5.5			3.5	1.5	2	1			4.5	3.5	4.5	3.5
			6	5	0	0			2.5	5.5	0	0			7.5	4.5	2	1			3	6	3	4			8.5	1.5	5.5	1.5			5	5	4	5			4.5	2.5	4.5	2.5			9.5	1.5	9.5	1.5
			7.5	3.5	0	0			4.5	2.5	0	0			8.5	0.5	0	0			3	1	1	0			4.5	4.5	1	2			2.5	3.5	2.5	1.5			7	4	6	4			4	4	3	4
			5	2	0	0			6.5	3.5	0	0			6.5	3.5	0	1			5.5	5.5	5.5	3.5			4.5	2.5	1	0			3.5	5.5	3	3			6	1	5	1			1	3	1	3
			3.5	3.5	0	0			7.5	11.5	0	1			8	4	1	1			6	1	0.5	0.5			6	6	6	3			2	3	1	1			4.5	1.5	2.5	1.5			7.5	3.5	6	1
			6.5	1.5	0	0			6.5	0.5	0	0			8	2	1	0			1	1	1	0			6	5	3.5	3.5			5	5	5	3			2.5	2.5	1	0			5	3	4	3
			5	2	0	0			3.5	1.5	0	0			2.5	2.5	0	0			5	1	2	0			6.5	2.5	6.5	0.5			9	4	5	4			1	2	0	1			1.5	1.5	1.5	1.5
			7	7	0	0			5.5	4.5	0	0			2.5	5.5	0	1			3	4	1	4			1.5	1.5	0.5	0.5			7.5	2.5	4.5	1.5			3	2	3	2			3	2	3	2
			5	1	0	0			6	1	1	1			2.5	2.5	0	0			1.5	5.5	0.5	5.5			5.5	5.5	3	2			2.5	4.5	2	3			6	4	5	1			4	3	4	3
			4	7	0	0			5.5	3.5	0	0			4	3	1	3			8	0	2	0			4	5	1	4			3.5	4.5	2.5	2.5			4	3	4	2			4	4	4	4
			6.5	5.5	0	0			5.5	5.5	0	0			4	1	0	0			5	3	4	3			7	3	5	0			6.5	7.5	5	5			5	4	2.5	3.5			6.5	0.5	6.5	0.5
			8	5	0	0			3.5	5.5	0	0			8	3	0	1			2.5	7.5	0	2			4	0	1	0		N2	2.5	12.5	1.5	3.5			4	3	2	1			3.5	2.5	3.5	2.5
			11	3	0	0			6.5	3.5	0	0			6	2	1	1		N2	7	6	1	1			6.5	3.5	4	3			8	3	6	1		N2	4.5	4.5	3.5	1.5			4.5	4.5	4	1
			4	5	0	0			6	6	0	2			3	3	0	0			5	1	1.5	0.5		N2	3	4	0	3			4.5	3.5	4.5	3.5			5.5	2.5	5	2		N2	1.5	2.5	1.5	2.5
			7.5	8.5	0	0			2.5	2.5	0	1			3	3	1.5	0.5			9	5	2	4			3	1	0	0			4	3	2	1			2	5	1	3			6	2	6	1
			7	2	0	0			4	1	1	0			6.5	6.5	1.5	1.5			4	7	0	6			5.5	3.5	1	0			6	6	6	3			1	4	1	4			2	3	1	2
			10.5	4.5	0	0			4	2	0	0			3.5	2.5	0.5	0.5			3.5	4.5	1	2			7	5	4	2			3.5	4.5	2	3			2	0	1	0			6	6	6	5
		N2	8	2	0	0		N2	6	3	0	0			5	5	0	0			6	1	0	0			3	4	1.5	2.5			2	3	0.5	1.5			2	3	2	1			4	3	0	1
			5	4	0	0			5	6	0	0			7.5	4.5	0	0			7.5	2.5	3	0			6.5	4.5	3.5	1.5			5.5	3.5	3.5	3.5			5.5	4.5	5.5	3.5			4	5	4	2
			8.5	6.5	0	0			5	2	0.5	0.5			6.5	5.5	3	3			2.5	1.5	0	1			9.5	2.5	6.5	1.5			5.5	2.5	5	2			5	11	0	9			3	5	1	3
			3	2	0	0			6	5	0	0			3	3	2	1			3	5	1	2			8.5	1.5	4.5	1.5			2.5	4.5	1	2			11	5	11	3			7	2	4	2
			7	6	0	0			2	5	0	0			6	4	0	1			1.5	1.5	1.5	1.5			1	7	1	2			4	1	2	1			6	2	5.5	1.5			4	2	4	2
			7.5	6.5	0	0			3	6	0	1			3.5	5.5	3.5	2.5			2.5	2.5	0.5	1.5			5	3	2	3			2.5	1.5	0	0			5.5	10.5	4.5	8.5			3.5	1.5	2.5	0.5
			5	3	0	0			4	2	0	0			5	6	0	0			4	8	0	0			3.5	4.5	3	2			1.5	10.5	1	4			4.5	4.5	3.5	4.5			7	5	7	5
			6	5	0	0			6.5	3.5	0	0			0	0	0	0			7	4	0	1			7	3	3	3			7.5	4.5	5.5	4.5			5	7	2.5	2.5			3	2	2	2
			5.5	3.5	0	0			4	3	0	0			3.5	4.5	1	2			8	3	1.5	2.5			2	6	0.5	1.5			5	7	2	5			5.5	0.5	5.5	0.5			3.5	1.5	3.5	1.5
			8.5	2.5	0	0			3.5	5.5	0	2			1	2	1	2			5.5	4.5	1	3			2	3	1	1			1	4	1	1			3	3	2	2			1.5	4.5	1.5	3.5
			6	5	0	0			8	3	1	2			6	7	2	0			2.5	1.5	0	1			1	4	0	0			2.5	4.5	2.5	1.5			4.5	7.5	4.5	4.5			9	5	8	3
			6	5	0	0			9	2	0	0			3.5	1.5	0.5	1.5			1.5	2.5	0	1			2.5	3.5	0.5	2.5			4.5	7.5	2.5	1.5			5	3	5	3			1	3	1	3
			9	1	0	0			5.5	1.5	1	1			4.5	5.5	0	0			1.5	2.5	1	0			3.5	4.5	0	2			2	4	2	0			3	3	2	2			7.5	1.5	7.5	1.5
			9	6	0	0			8	5	0	0		N2	3	3	0.5	1.5			5.5	0.5	1	0			6	6	4	1			3	1	1.5	0.5			7	4	4	2			6	3	6	3
			10	1	0	0			3	4	0	0			3.5	3.5	2.5	3.5			5.5	4.5	1	1			7	6	3.5	3			2.5	0.5	1.5	0.5			2.5	1.5	1.5	1.5			4.5	4.5	4.5	2.5
			1.5	3.5	0	1			7	2	1	0			4	4	0	0			2	1	0	0			8	3	5	1			7	8	4	3			2	2	1	1			3	3	3	0
			6	3	0	0			4.5	0.5	0	0			3	6	0	3			8	2	5	1			2.5	3.5	1.5	2.5			5	3	0	1			3	5	2	3			2.5	6.5	1.5	3.5
			4.5	0.5	2	1			4	2	0	0			11.5	7.5	0	0			6	8	3	7			3.5	0.5	1.5	0.5			4	11	0	4			8	5	5.5	4.5			8	2	6.5	1.5
			6.5	1.5	0	0			4	4	0	2			5.5	1.5	0.5	0.5			8	3	4	0			5.5	1.5	1	0			10.5	4.5	3.5	4.5			4	2	4	2			7	7	2	2
			3.5	2.5	0	0			3	4	0	0			9.5	2.5	0	0			7	7	0	2			4	9	2	4			1.5	3.5	1	2			1	3	0	1			1.5	2.5	1.5	1.5
			5.5	5.5	0	0			9	9	0	0			9	5	1.5	1.5			3	1	1	1			5.5	2.5	2.5	1.5		N3	4	6	3	1			4	4	2	3			8	3	8	2
			6	5	0	0			7	3	0	0			5	3	3	3			2	5	1	1			4.5	1.5	2.5	0.5			8	7	7.5	5.5		N3	4	1	4	1		N3	5	4	5	4
			4.5	4.5	0	0			7	2	1.5	0.5			5	1	0	0			4	0	1	0			8	7	4	6			8.5	9.5	6.5	6.5			3	7	3	6			1.5	3.5	1.5	3.5
			5	3	0	0			3	3	1	0			6	4	0.5	2.5			3	5	0	2		N3	6.5	2.5	5.5	1.5			5.5	7.5	2.5	4.5			5.5	3.5	4.5	3.5			4	3	3	1
			6	3	0	0			4	5	1	1			2	2	0	1		N3	4	0	0	0			4.5	3.5	1	1			2	2	2	2			1.5	3.5	1.5	3.5			2.5	4.5	2.5	4.5
			5	3	0	0			4.5	8.5	0	2			8	3	0	0			2.5	2.5	0	0			4	9	2	5			5	1	2	0			5.5	11.5	4.5	7.5			4.5	2.5	4.5	2.5
			5.5	3.5	0	0			4	4	0	0			3	2	0	0			5	1	0.5	0.5			4	3	3	2			2.5	5.5	1.5	2.5			5.5	1.5	3.5	1.5			7.5	2.5	7.5	2.5
			5	3	0	0			3.5	4.5	0	0			6	0	0	0			3	14	0.5	1.5			3	5	2	3			3.5	5	2.5	4.5			4	5	1	2			1	1	1	1
			3	3	0	0			3.5	6.5	0	0			6.5	3.5	0	0			4	7	1	2			2.5	5.5	0.5	0.5			4	2	0	1			6	2	6	1			1.5	1.5	1.5	1.5
			4	6	0	0			2.5	6.5	0	0			6	6	1	1			4	3	0	0			5.5	4.5	2	4			3.5	4.5	3	1			5	2	4	1			6.5	6.5	6.5	5.5
			4	5	0	0			9	3	1	0			7	6	0	0			2.5	6.5	0	2			7	6	3.5	5.5			4	6	1	3			4	5	4	4			1.5	3.5	1.5	3.5
		N3	2	1	0	0		N3	11	2	0	0			3.5	0.5	0.5	0.5			5	2	0	2			6	5	3	5			4.5	3.5	1	0			3	3	3	3			3	1	3	1
			8.5	8.5	0	0			4	2	0	0			4	1	1	1			7.5	3.5	1.5	1.5			4.5	2.5	2.5	1.5			2	2	0	0			4	5	3	4			3	3	3	2
			4.5	3.5	0	0			3.5	2.5	0	1.5			5	5	2	1			6	6	5	2			6	6	5.5	1.5			4	3	0.5	1.5			2.5	2.5	1.5	2.5			8.5	7.5	7.5	7.5
			4	1	0	0			7.5	5.5	0	0			8.5	3.5	0.5	1.5			4.5	4.5	1	2			2.5	3.5	0.5	2.5			5.5	3.5	1	2			6.5	6.5	6.5	2.5			4.5	3.5	3.5	2.5
			8	3	0	0			4.5	6.5	0	3			4	6	0	3			7	4	2	3			4	3	3	2			10	5	7	2			1.5	3.5	1.5	1.5			9.5	3.5	9.5	3.5
			6	3	0	0			3.5	1.5	0	0			7.5	6.5	2	6			5	2	1.5	1.5			2.5	5.5	2.5	0.5			4	4	3	2			5.5	6.5	4.5	3.5			5	2	5	2
			3	1	0	0			1	3	0	0			2	2	1	1			1.5	3.5	0	2			3	5	1	1			1.5	2.5	1	2			9.5	5.5	8	3			5.5	4.5	5.5	3.5
			3.5	4.5	0	0			6.5	0.5	0	0			3	5	0.5	3.5			7	4	2	2			4.5	2.5	2.5	0.5			3	4	4	0			4.5	8.5	4.5	5.5			7	4	7	4
			6.5	4.5	0	0			3.5	5.5	0	0			8	3	0	0			7	4	0	0			2.5	4.5	2	2			1.5	3.5	1	2			5.5	4.5	2.5	1.5			4	1	3.5	0.5
			9	6	0	0			6	4	0	0			4	4	3	0			2.5	4.5	0.5	2.5			7	6	3.5	3			2.5	1.5	0	0			3	7	3	3			4.5	3.5	4.5	3.5
			5	4	0	0			5	6	0	0			7	2	0	0			3	0	1	0									4.5	2.5	2.5	0.5			2	6	2	4			3.5	0.5	3.5	0.5
			8	6	0	0			7	6	0	2			6.5	0.5	1	0			4.5	12.5	4	7															3	7	2	7			2	1	2	1
			7.5	4.5	0	0			4	1	1	0			10	4	0	0			8	3	5	1																					4	1	4	1
			5	2	0	0			6	4	0	0		N3	2	3	0	3
			6.5	4.5	0	0			2	3	0	0			4.5	2.5	2	0
			5.5	2.5	0	0			6	4	0	0			6.5	3.5	0.5	2.5
			6	6	0	0			6	2	1	0			5.5	2.5	0	0
			7.5	2.5	0	0			6	5	0	0			4	2	1	0
			6	4	0	0			4	2	0	0			5.5	2.5	0	1
			6.5	7.5	0	0			6.5	2.5	0	0			6.5	2.5	0	0
			5	3	0	0			5	3	0	0			5	6	0.5	2.5
			4.5	3.5	0	0			2	6	0	2			5.5	4.5	0.5	2.5
			8.5	1	0	0			8	3	1	2			6.5	2.5	2	0
			7	2	0	0			4	2	0	0			4.5	4.5	0	0
			7.5	3.5	0	0			6.5	1.5	1	1			4.5	4.5	1	0
			2	4	0	0			5	7	0	0			1.5	3.5	1	1
			10.5	3	0	0			4.5	0.5	0	0			6.5	2.5	2	0
			6.5	4.5	0	0									5	0	0	0
			4	5	0	0									1.5	4.5	0.5	2.5
															4.5	5.5	0.5	0.5
															3	3	0	1
															6	1	0.5	0.5
															4	4	0	0
															7	4	0	0
															3	2	3	1
															4.5	1.5	1	0
															3.5	5.5	0.5	1.5
															4	7	0	0
															7.5	2.5	1	0
															4.5	0.5	0	0
															1	3	0	1
															11.5	0.5	1	0
															7	3	4	2
															6.5	2.5	2	0
															4	3	0	0
															3	5	0.5	1.5
															8	11	1.5	5.5
															4.5	1.5	3	0
															9	0	0	0
															5	7	0	3
															6	7	0	3
															6	2	1	0
															4	9	1.5	5.5
															4.5	11.5	0.5	6.5
															4.5	4.5	0	1
															6	6	0	1
															5	6	1.5	3.5
															4.5	9.5	0	0
