# Supplementary material for: Telomerase biogenesis requires a novel Mex67 function and a cytoplasmic association with the Sm7 complex
Source: eLife. 2020 Oct 23;9:e60000. doi: 10.7554/eLife.60000 (PMC7644208; doi:10.7554/eLife.60000)
Supplement: Figure 3—figure supplement 1—source data 1. [file elife-60000-fig3-figsupp1-data1.xlsx]

## Sheet: Fig. 3-fig. S1A,B
Figure 3 - figure supplement 1A, B. Southern blot quantification of unrecombined TLC1 (A) and recombined TLC1-MS2 (B) genomic loci following induction of recombination in wild type, xpo1-1 and kap122 cells.
wild type (YV349, 352)
N1	Name	band	background		N2	Name	band	background		N3	Name	band	background		N4	Name	band	background		N5	Name	band	background
	TLC1 0h	226779	52579.2			TLC1 0h	206256	70469.4			TLC1 0h	644001	156846			TLC1 0h	246566	54465.2			TLC1 0h	177189	41857
	TLC1 0.5h	221806	63502.3			TLC1 0.5h	146946	73417.6			TLC1 0.5h	170068	64923.7			TLC1 0.5h	226721	61844.2			TLC1 0.5h	118859	39017.3
	TLC1 1h	171060	54921			TLC1 1h	114735	61511.8			TLC1 1h	112943	54232.9			TLC1 1h	156246	46876.2			TLC1 1h	80131	25761.7
	TLC1 2h	91120	42842.9			TLC1 2h	86314.5	60613.5			TLC1 2h	75727.3	45407.7			TLC1 2h	44379.9	22312.1			TLC1 2h	61356.3	24864.8
	TLC1 3h	57614.7	31432.3			TLC1 3h	64685	51924.8			TLC1 3h	60939.6	42621.2			TLC1 3h	22821.4	11580.6			TLC1 3h	47360.4	17780.4
	TLC1 4h	26376.8	17468.6			TLC1 4h	95764.2	77675.5			TLC1 4h	56421.7	42658			TLC1 4h	19561.2	12671.3			TLC1 4h	21181.3	9622.21
	TLC1 (+)	21567.7	17117			TLC1 8h	60429.4	52398.8			TLC1 8h	54654.3	43435.4			TLC1 8h	17276.6	12789.1			TLC1 8h	11282.1	7329.55
	TLC1-MS2 0h	46311.2	20389.7			TLC1 16h	64023.6	56678.7			TLC1 16h	53469.9	42784.1			TLC1 16h	27468.3	18185.5			TLC1 16h	13364.3	10148.7
	TLC1-MS2 0.5h	161619	47998.9			TLC1 (+)	50723.1	46039.6			TLC1 (+)	68317.2	53720.6			TLC1 (+)	16575.6	10734.8			TLC1 (+)	10456.9	7996.41
	TLC1-MS2 1h	274214	74019			TLC1-MS2 0h	44873.8	43227.2			TLC1-MS2 0h	66135.1	56396.9			TLC1-MS2 0h	20271.1	20249.7			TLC1-MS2 0h
	TLC1-MS2 2h	391061	90541.4			TLC1-MS2 0.5h	114409	55474.1			TLC1-MS2 0.5h	127905	54031.5			TLC1-MS2 0.5h	172087	41912.2			TLC1-MS2 0.5h
	TLC1-MS2 3h	336593	68025.8			TLC1-MS2 1h	153430	57355.6			TLC1-MS2 1h	165185	54210			TLC1-MS2 1h	291599	62754.5			TLC1-MS2 1h	156508	35309
	TLC1-MS2 4h	202997	40244.3			TLC1-MS2 2h	225180	70555.7			TLC1-MS2 2h	198228	60572.8			TLC1-MS2 2h					TLC1-MS2 2h	195213	39841.6
	TLC1-MS2 (+)	257359	33104.1			TLC1-MS2 3h	241946	69395.1			TLC1-MS2 3h	206490	69665.8			TLC1-MS2 3h	214671	31953.2			TLC1-MS2 3h	232627	40856.5
	CEN4 0h	67414.1	31774.9			TLC1-MS2 4h	797003	102139			TLC1-MS2 4h	275087	68133.1			TLC1-MS2 4h					TLC1-MS2 4h	161628	27080.6
	CEN4 0.5h	101789	42701.7			TLC1-MS2 8h	360219	98929.9			TLC1-MS2 8h	300289	68771.9			TLC1-MS2 8h					TLC1-MS2 8h	179524	28612.3
	CEN4 1h	134039	48050.1			TLC1-MS2 16h	588800	101224			TLC1-MS2 16h	334478	76256.6			TLC1-MS2 16h					TLC1-MS2 16h	256349	36090.3
	CEN4 2h	134001	45324.1			TLC1-MS2 (+)	266391	70314			TLC1-MS2 (+)	558318	100865			TLC1-MS2 (+)	205793	25337.8			TLC1-MS2 (+)	197105	31978.9
	CEN4 3h	95077.7	38462			CEN4 0h	88967.8	54784.7			CEN4 0h	255785	99155.5			CEN4 0h	90109.7	35575.8			CEN4 0h	64276.9	23778.8
	CEN4 4h	66602.1	23575.9			CEN4 0.5h	125091	70970.1			CEN4 0.5h	138450	66312.9			CEN4 0.5h	140928	52860.3			CEN4 0.5h	72567.5	32412.1
	CEN4 (+)	56225.2	24803.3			CEN4 1h	115386	64859			CEN4 1h	142857	65800.8			CEN4 1h	151136	54583.8			CEN4 1h	73386.9	25043.6
						CEN4 2h	130696	70619.7			CEN4 2h	125053	55539.4			CEN4 2h	86748.2	31941.6			CEN4 2h	72564.5	27564.7
						CEN4 3h	129299	66805.5			CEN4 3h	147448	59474.8			CEN4 3h	70812.2	22215.5			CEN4 3h	78840.7	26007.3
						CEN4 4h	303552	110022			CEN4 4h	151308	59679.7			CEN4 4h	81599.8	25924.2			CEN4 4h	48216.8	15358.8
						CEN4 8h	154732	72751.8			CEN4 8h	161519	64768.7			CEN4 8h	81216.1	24645.9			CEN4 8h	56208.3	15343.2
						CEN4 16h	217378	83214			CEN4 16h	174937	65905.5			CEN4 16h	106539	35369.6			CEN4 16h	82023.8	22891.8
						CEN4 (+)	105016	56066.6			CEN4 (+)	265077	90028.3			CEN4 (+)	69010.4	22423.3			CEN4 (+)	55266.6	16328.5
kap122
N1	Name	band	background		N2	Name	band	background		N3	Name	band	background		N4	Name	band	background		N5	Name	band	background
	TLC1 0h	28533.3	9330.65			TLC1 0h	67427.8	20049.4			TLC1 0h	34910.1	9275.16			TLC1 0h	75115.1	12225			TLC1 0h	134781	21177.6
	TLC1 0.5h					TLC1 0.5h	29891.9	11105.7			TLC1 0.5h					TLC1 0.5h	43130.1	8403.35			TLC1 0.5h	39619.9	7090.26
	TLC1 1h					TLC1 1h	12918.5	4748.17			TLC1 1h					TLC1 1h	25817.6	4614.49			TLC1 1h	15882.9	2560.27
	TLC1 2h	7205.6	3369.49			TLC1 2h	8986.04	3189.72			TLC1 2h					TLC1 2h	6400.58	1509.24			TLC1 2h	5025.29	1599.11
	TLC1 3h	5147.32	2537.42			TLC1 3h	3362.8	1819.95			TLC1 3h	4850.59	2279.6			TLC1 3h	2694.99	1104.06			TLC1 3h	1927.87	857.92
	TLC1 4h	4446.03	2494.16			TLC1 4h	3927.34	2292.02			TLC1 4h	4359.98	2922.12			TLC1 4h	1263.27	865.07			TLC1 4h	2595.24	1501.77
	TLC1 (+)	2772.28	1889.22			TLC1 (+)	3025.89	1590.08			TLC1 8h	1200.85	847.88			TLC1 8h	542.41	432.81			TLC1 8h	1634.1	1247.89
	TLC1-MS2 0h	2567.3	2935.58			TLC1-MS2 0h	3076.17	2601.14			TLC1 16h	1581.74	1098.48			TLC1 16h	1995.24	1410.08			TLC1 16h	1475.41	1118.23
	TLC1-MS2 0.5h	25516.1	12041			TLC1-MS2 0.5h	30601.1	10526.6			TLC1 (+)	1193.2	826.25			TLC1 (+)	2059.74	1426.24			TLC1 (+)	2059.74	1426.24
	TLC1-MS2 1h	35372.5	13049.4			TLC1-MS2 1h	36739.3	12413.4			TLC1-MS2 0h	3112.08	2672.72			TLC1-MS2 0h	3653.05	1908.43			TLC1-MS2 0h	4025.32	2879.53
	TLC1-MS2 2h	60460.4	12829.9			TLC1-MS2 2h	47626.1	13744.9			TLC1-MS2 0.5h	33898	6010.08			TLC1-MS2 0.5h	39430.8	4606.55			TLC1-MS2 0.5h	24496.1	3763.83
	TLC1-MS2 3h	75843.4	21036.7			TLC1-MS2 3h	36508.2	8309.02			TLC1-MS2 1h	79113.6	13935.9			TLC1-MS2 1h	60561.7	6711.77			TLC1-MS2 1h	33287.3	3813.97
	TLC1-MS2 4h	71337.2	18832.8			TLC1-MS2 4h	53765.6	11885.3			TLC1-MS2 2h	96952.9	14432			TLC1-MS2 2h	58444.8	6395.99			TLC1-MS2 2h	54327.7	5898.6
	TLC1-MS2 (+)	79106.2	7423.97			TLC1-MS2 (+)	44767.8	6642.45			TLC1-MS2 3h	107332	12890.2			TLC1-MS2 3h	61600.6	5945.26			TLC1-MS2 3h	46884.3	4947.46
	CEN4 0h	32421.7	13575.5			CEN4 0h	26895	9913.83			TLC1-MS2 4h	135675	15596.6			TLC1-MS2 4h	50766	4509.85			TLC1-MS2 4h	82043.2	8670.8
	CEN4 0.5h	26647.6	9793.77			CEN4 0.5h	21933.6	9581.9			TLC1-MS2 8h	62062.2	6307.44			TLC1-MS2 8h	23666.2	1662.15			TLC1-MS2 8h
	CEN4 1h	24812.1	8430.05			CEN4 1h	19824	7249.73			TLC1-MS2 16h	92413.6	6848.56			TLC1-MS2 16h	96160.1	6398.69			TLC1-MS2 16h	73363.9	6226.51
	CEN4 2h	24340.3	7850.78			CEN4 2h	24543	8631.55			TLC1-MS2 (+)	54403.8	3188.03			TLC1-MS2 (+)	70787.1	4935.25			TLC1-MS2 (+)	70787.1	4935.25
	CEN4 3h	23109.8	5219.19			CEN4 3h	15536.8	4343.97			CEN4 0h	28279.4	8298.04			CEN4 0h	22557	5847.19			CEN4 0h	37802.8	10461.9
	CEN4 4h	21411.6	5601.8			CEN4 4h	19000.6	6045.67			CEN4 0.5h	25186.7	6611.17			CEN4 0.5h	24484.4	5983.53			CEN4 0.5h	18141	4487.13
	CEN4 (+)	15664.7	4037.13			CEN4 (+)	12605.9	4589.26			CEN4 1h	26918.7	6863.3			CEN4 1h	23605.9	4686.57			CEN4 1h	13917.8	2553.99
											CEN4 2h	28643.7	6607.71			CEN4 2h	19766	3573.75			CEN4 2h	18456.1	3455.65
											CEN4 3h	31843.3	6338.09			CEN4 3h	20216.3	2807.43			CEN4 3h	15710.4	2227.34
											CEN4 4h	37471.2	8540.23			CEN4 4h	14718.7	2439.98			CEN4 4h	25805.3	4461.95
											CEN4 8h	15557.9	3130.21			CEN4 8h	6177.65	1121.44			CEN4 8h	14644.5	3181.28
											CEN4 16h	32834.9	4731			CEN4 16h	42203.1	6090.06			CEN4 16h	17507.7	2873.99
											CEN4 (+)	18078.7	2828.64			CEN4 (+)	25795.5	4697.85			CEN4 (+)	25795.5	4697.85
xpo1-1 37°C
N1	Name	band	background		N2	Name	band	background		N3	Name	band	background
	TLC1 0h	8405.96	422.84			TLC1 0h	12405.7	930.34			TLC1 0h	5109.29	298.41
	TLC1 0.5h	1974.49	208.16			TLC1 0.5h	4034.6	585.77			TLC1 0.5h	3287.91	239.44
	TLC1 1h	310.15	74.27			TLC1 1h	1134.56	258.94			TLC1 1h	2821.64	245.84
	TLC1 2h	268.86	124.77			TLC1 2h	756.04	406.42			TLC1 2h	1558.82	234.72
	TLC1 3h	203.43	144.3			TLC1 3h	729.13	460.39			TLC1 3h	812.15	289.98
	TLC1 4h	156.84	105.43			TLC1 4h	697.07	435.28			TLC1 4h	685.23	306.13
	TLC1 8h	155.71	137.12			TLC1 8h	812.97	585.73			TLC1 8h	214.92	166.3
	TLC1 (+)	425.36	373.05			TLC1 (+)	3508.03	2395.63			TLC1 (+)	245.77	237.07
	TLC1-MS2 0h	282.2	207.93			TLC1-MS2 0h	542.55	263.58			TLC1-MS2 0h	135.19	127.9
	TLC1-MS2 0.5h	3743.27	351.28			TLC1-MS2 0.5h	6652.3	451.72			TLC1-MS2 0.5h	975.26	175.29
	TLC1-MS2 1h	6036.4	404.42			TLC1-MS2 1h	7842.32	455.72			TLC1-MS2 1h	3501.57	223.95
	TLC1-MS2 2h	19861.8	1062.16			TLC1-MS2 2h	17927.9	1016.53			TLC1-MS2 2h	6027.41	401.64
	TLC1-MS2 3h	21136.4	1116.63			TLC1-MS2 3h	21309.3	1211.95			TLC1-MS2 3h	11027.7	562.78
	TLC1-MS2 4h	14912.8	751.3			TLC1-MS2 4h	22590.4	1042.76			TLC1-MS2 4h	16911.4	961.23
	TLC1-MS2 8h	16801.6	868.75			TLC1-MS2 8h	20040.6	814.34			TLC1-MS2 8h	11248.2	501.41
	TLC1-MS2 (+)	43125.3	1991.28			TLC1-MS2 (+)	67538.5	4204.98			TLC1-MS2 (+)	17392	485.96
	CEN4 0h	1906.57	227.41			CEN4 0h	1838.94	297.02			CEN4 0h	613.86	131.13
	CEN4 0.5h	819.59	178.47			CEN4 0.5h	1776.23	400.43			CEN4 0.5h	688.77	142.17
	CEN4 1h	354.74	80.95			CEN4 1h	1151.47	191.7			CEN4 1h	1097.76	160.31
	CEN4 2h	1330.77	170.41			CEN4 2h	2245.63	327.73			CEN4 2h	903.5	155.97
	CEN4 3h	1237.57	174.7			CEN4 3h	3020.15	449.63			CEN4 3h	1168.8	211.83
	CEN4 4h	1036.49	136.98			CEN4 4h	3483.47	492.84			CEN4 4h	1732.92	217.15
	CEN4 8h	1581.43	195.76			CEN4 8h	5687.67	814.3			CEN4 8h	749.41	168.55
	CEN4 (+)	4891.91	558.88			CEN4 (+)	13532.3	3068.16			CEN4 (+)	1284.51	225.75

## Sheet: Fig. 3-fig. S1C
Figure 3 - figure supplement 1C. Relative nuclear and cytoplasmic fractions of new TLC1 foci detected by smFISH after recombination induction in xpo1-1 mutants at the permissive temperature.
N - nucleus
C - cytoplasm
xpo1-1 25°C			0 h				0.5 h				1 h				2 h				3 h				4 h				8 h
YV365, YV366			MS2 (coloc)				MS2 (coloc)				MS2 (coloc)				MS2 (coloc)				MS2 (coloc)				MS2 (coloc)				MS2 (coloc)
		N1	0	0		N1	0	1		N1	0	2		N1	2	3		N1	3	3		N1	3	0		N1	2	2
			0	0			0	0			0	1			0	0			2	2			3	2			3	1
			0	0			0	0			0	1			1	0			3	0			3	2			5	3
			0	0			1	0			1	2			1	3			2	2			1	1			3	1
			0	0			0	0			1	1			0	0			2	1			1	1			3	3
			0	0			1	2			0	2			0	0			1	2			1	0			0	0
			0	0			0	0			3	1			0	0			4	3			1	1			1	1
			0	0			0	1			2	0			0	1			1	2			4	0			2	1
			0	0			2	1			0	2			3	2			3	2			1	2			2	2
			0	0			1	1			1	0			2	0			1	4			4	0			4	4
			1	0			1	2			1	0			1	4			1	1			2	1			2	2
			0	0			0	1			1	1			0	0			2	1			2	3			8	4
			0	0			0	1			0	2			0	2			0	0			5	1			5	2
			0	0			1	3			1	1			0	4			1	2			4	0			3	1
			0	0			0	1			1	0			3	2			4	0			1	0			1	2
			0	0			1	0			0	1			0	0			2	1			3	2			2	0
			0	0			0	0			0	3			0	0			5	4			3	0			1	0
			0	0			0	0			0	1			0	0			4	3			2	3			2	0
			0	0			0	1			1	1			3	0			2	0			2	5			1	1
			0	0			2	0			1	3			0	0			3	1			5	2			3	2
			0	0			0	1			0	1			2	1			5	1			7	0			2	1
		N2	0	0		N2	0	0		N2	0	2		N2	1	4			4	4			2	3			4	0
			0	0			0	0			2	1			0	0			4	1			3	0			2	0
			0	0			2	2			0	0			2	4			4	3		N2	2	3			3	2
			0	1			0	0			0	3			1	3		N2	6	3			4	1			2	4
			0	0			1	1			1	0			3	4			6	1			2	4		N2	2	3
			0	0			2	1			1	1			0	0			4	1			1	0			1	2
			0	0			1	0			2	1			1	2			4	2			1	0			1	1
			0	0			0	1			0	2			1	0			2	4			4	5			0	2
			0	0			0	1			1	2			0	0			3	4			3	1			5	0
			0	0			1	1			1	0			0	0			1	2			1	4			1	0
			0	0			1	2			0	1			0	0			1	2			3	1			2	1
			0	0			1	1			0	0			3	0			1	3			5	1			4	2
			0	0			1	1			0	1			2	4			2	2			4	0			1	3
			0	0			0	1			0	2			0	0			2	3			1	1			4	0
			0	0			0	1			2	1			1	4			3	2			2	1			3	6
			0	0			0	0			1	2			1	2			1	5			0	1			2	1
			0	0			0	1			0	1			0	0			3	1			4	1			2	0
			1	0			1	1			0	2			3	0			2	1			9	3			3	4
			0	0			0	1			1	1			1	2			2	1			2	2			2	1
		N3	0	0		N3	0	2		N3	1	2		N3	0	0			2	2			3	0			5	4
			0	0			1	3			2	1			0	0			4	5			3	5			4	0
			0	0			0	1			0	1			3	2			6	3			1	2			1	0
			0	0			1	1			0	1			0	0			4	4		N3	10	3			8	5
			0	0			1	0			2	2			0	0		N3	3	1			2	5			9	3
			0	0			0	0			2	1			3	0			1	5			2	3			3	2
			0	0			0	0			0	2			2	3			1	3			4	3			4	2
			0	0			1	2			1	3			0	0			2	2			2	4			2	2
			0	0			0	1			0	2			3	4			2	3			0	2			2	1
			0	0			0	1			2	1			0	0			5	4			0	5		N3	5	6
			0	0			0	0			1	0			1	4			4	3			4	3			1	0
			0	0			1	2			0	1			1	2			2	2			0	3			0	1
			0	0			0	0			1	1			3	0			3	0			5	3			1	3
			0	0			1	0			3	0			2	4			2	1			4	4			6	1
			1	0			2	1			1	2			0	2			1	2			3	3			2	1
			0	0			1	1			1	0			0	4			1	3			3	2			2	6
			0	0			0	1			0	1			1	4			3	0			2	3			8	8
			0	0			0	1			0	1			2	4			2	2			4	3			1	6
			0	0			0	2			0	0			3	1			2	1			1	4			3	3
			0	0			1	0			1	2			2	3			2	2			3	1			3	1
																			5	4			1	0			4	1
																			4	3			3	2			0	5
																			2	1			2	3			2	6
																			2	2			4	1			2	1
																			4	4			9	3			7	5
																			4	1			2	2			2	2
																			4	3			7	0			6	2
																			2	0			2	3			0	3
																											3	3
																											7	6
																											5	4
																											3	2
																											8	4
																											6	3

## Sheet: Fig. 3-fig. S1D
Figure 3 - figure supplement 1D. Relative nuclear and cytoplasmic fractions of new TLC1 foci detected by smFISH after recombination induction in wild type cells at the restrictive temperature
N - nucleus
C - cytoplasm
wild type 37°C			0 h				2 h				4 h				8 h
YV349, YV352			MS2 (coloc)				MS2 (coloc)				MS2 (coloc)				MS2 (coloc)
			N	C			N	C			N	C			N	C
		N1	0	0		N1	1	1		N1	1	0		N1	7	0
			0	0			5	6			1	2			3	0
			1	0			3	0			7	1			2	0
			0	0			3	1			3	0			5	1
			0	0			0	2			7	3			5	5
			0	0			3	6			5	2			3	0
			0	0			4	2			3	0			10	2
			0	0			6	3			4	1			3	1
			0	0			2	0			1	1			5	4
			0	0			7	1			5	0			9	2
			0	0			2	1			4	3			2	0
			0	0			1	1			5	1			5	1
			0	0			0	1			2	0			7	0
			1	0			5	2			3	8			7	0
			0	0			7	0			7	2			6	2
			0	0			1	0			3	3			1	2
			0	0			5	1			4	5			3	5
			0	0			4	2			6	1			2	0
			0	0			2	3			2	1			9	1
			0	0			0	1			8	1			6	2
		N2	0	0			0	0			9	7		N2	2	2
			0	1		N2	3	2		N2	4	2			6	2
			0	0			0	0			1	0			3	1
			0	0			6	2			3	0			4	0
			0	0			5	3			1	1			5	0
			0	0			3	1			6	2			2	6
			0	0			1	0			4	4			6	8
			0	0			6	0			2	0			8	3
			0	0			6	1			4	3			1	1
			0	0			4	2			3	4			7	2
			0	0			0	1			1	4			7	2
			0	0			2	0			4	3			3	5
			0	0			5	2			6	8			5	3
			0	0			1	1			4	2			8	2
			1	0			2	5			5	2			4	3
			0	0			3	2			2	3			6	0
			0	0			0	3			4	1			3	1
			0	0			4	2			7	2			2	2
		N3	0	0			4	5			3	0			6	1
			0	0			2	1			6	1			5	6
			0	0			3	1		N3	4	2			4	0
			0	0		N3	0	1			3	4		N3	5	3
			1	0			6	2			2	1			3	2
			0	0			7	2			3	2			7	4
			0	0			2	0			6	2			8	1
			0	0			3	1			2	2			2	5
			0	0			6	2			6	2			6	2
			0	0			3	1			4	1			5	4
			0	1			4	0			4	5			2	3
			0	0			1	2			5	2			7	1
			0	0			3	4			2	3			3	2
			0	0			4	1			5	3			5	0
			0	0			0	0			7	2			1	4
							2	0			1	4			5	2
							6	2			6	0			1	4
							2	4			4	4			8	6
							1	1			6	3
							0	5			3	4

## Sheet: Fig. 3-fig. S1E
Figure 3 - figure supplement 1E. Relative nuclear and cytoplasmic fractions of untagged TLC1 foci detected by smFISH before recombination induction (at the steady state) in wild type and kap122Δ cells.
N - nucleus
C - cytoplasm			wild type						kap122
			0h						0 h
wild type			TLC1 (total)		MS2 (coloc)				TLC1 (total)		MS2 (coloc)
YV349, YV352			N	C	N	C			N	C	N	C
		N1	7.5	2.5	0	0		N1	1	4	1	1
kap122			5	0	0	0			3	2	0	1
YV355, YV356			5	0	0	0			2	3	0	0
			4.5	2.5	0	0			2	4	0	0
			5	3	0	0			1	4	0	0
			2.5	1.5	0	0			3	3	0	0
			9	8	0	0			2	2	0	0
			5	2	0	0			1	1	0	0
			9	8	0	0			2	2	0	0
			10	5	0	0			4	4	0	0
			3	3	0	0			2	2	0	0
			3	3	0	0			4	2	0	0
			5	4	0	0			2	3	0	0
			7	6	0	0			2	2	0	0
			3.5	3.5	0	0			3	3	0	2
			6	5	0	0			2	0	1	0
			7.5	3.5	0	0			6	4	0	0
			5	2	0	0			7	4	0	0
			3.5	3.5	0	0			0	7	0	0
			6.5	1.5	0	0			5	4	0	0
			5	2	0	0		N2	1	1	0	0
			7	7	0	0			3	7	0	0
			5	1	0	0			0	3	0	0
			4	7	0	0			3	1	0	0
			6.5	5.5	0	0			4	1	0	0
			8	5	0	0			4	5	0	0
			11	3	0	0			2	4	0	0
			4	5	0	0			2	4	0	0
			7.5	8.5	0	0			6	5	0	1
			7	2	0	0			2	2	0	0
			10.5	4.5	0	0			4	3	0	0
		N2	8	2	0	0			1	3	0	0
			5	4	0	0			6	2	0	0
			8.5	6.5	0	0			2	5	0	0
			3	2	0	0			2	4	1	0
			7	6	0	0			2	3	0	0
			7.5	6.5	0	0			1	4	0	0
			5	3	0	0			3	4	0	0
			6	5	0	0			4	7	0	0
			5.5	3.5	0	0			1	3	0	0
			8.5	2.5	0	0		N3	3	1	0	0
			6	5	0	0			0	2	0	0
			6	5	0	0			4	5	0	0
			9	1	0	0			1	6	0	0
			9	6	0	0			2	3	0	0
			10	1	0	0			2	5	0	0
			1.5	3.5	0	1			4	6	0	0
			6	3	0	0			3	1	0	0
			4.5	0.5	2	1			0	3	0	0
			6.5	1.5	0	0			2	2	0	0
			3.5	2.5	0	0			1	4	0	0
			5.5	5.5	0	0			1	2	0	1
			6	5	0	0			2	3	0	0
			4.5	4.5	0	0			3	0	0	0
			5	3	0	0			4	6	0	0
			6	3	0	0			3	3	0	0
			5	3	0	0			1	2	0	0
			5.5	3.5	0	0			4	2	0	0
			5	3	0	0			5	3	0	1
			3	3	0	0			1	6	0	0
			4	6	0	0			2	5	0	0
			4	5	0	0			6	3	0	0
		N3	2	1	0	0			5	4	0	0
			8.5	8.5	0	0			3	3	0	0
			4.5	3.5	0	0			2	5	0	0
			4	1	0	0
			8	3	0	0
			6	3	0	0
			3	1	0	0
			3.5	4.5	0	0
			6.5	4.5	0	0
			9	6	0	0
			5	4	0	0
			8	6	0	0
			7.5	4.5	0	0
			5	2	0	0
			6.5	4.5	0	0
			5.5	2.5	0	0
			6	6	0	0
			7.5	2.5	0	0
			6	4	0	0
			6.5	7.5	0	0
			5	3	0	0
			4.5	3.5	0	0
			8.5	1	0	0
			7	2	0	0
			7.5	3.5	0	0
			2	4	0	0
			10.5	3	0	0
			6.5	4.5	0	0
			4	5	0	0

## Sheet: Fig. 3-fig. S1F
Figure 3 - figure supplement 1F. Northern blot quantification of tagged TLC1-MS2 RNA transcripts following recombination induction in xpo1-1 cells grown at the permissive and restrictive temperatures.
xpo1-1		xpo1-1 37°C
YV365, YV366		N1	Name	band	background		N2	Name	band	background		N3	Name	band	background
			TLC1-MS2 0h	8424.35	5865.16			TLC1-MS2 0h	11415.8	7733.27			TLC1-MS2 0h	2078.25	1882.11
			TLC1-MS2 0.5h	9313.7	5187.53			TLC1-MS2 0.5h	16308.9	9022.92			TLC1-MS2 0.5h	6465.68	4230.2
			TLC1-MS2 1h	15197.5	5706.13			TLC1-MS2 1h	22739	9709.25			TLC1-MS2 1h	20833.9	7968.78
			TLC1-MS2 2h	34606.7	10454.2			TLC1-MS2 2h	38068.9	9423.15			TLC1-MS2 2h	36666.2	14672.4
			TLC1-MS2 3h	48593.1	9656.05			TLC1-MS2 3h	54082.3	11195.3			TLC1-MS2 3h	54558.7	19704.7
			TLC1-MS2 4h	67541.4	12959.6			TLC1-MS2 4h	54068.1	11675.1			TLC1-MS2 4h	56624.6	19975.6
			TLC1-MS2 8h	85135.1	13608.8			TLC1-MS2 8h	84450.8	14314.7			TLC1-MS2 8h	85935	23105.9
			TLC1-MS2 (+)	21034.6	8835.36			TLC1-MS2 (+)	28538.3	11938.3			TLC1-MS2 (+)	61313.7	17092.9
			U1 0h	47380.6	5121.53			U1 0h	80524.6	7055.52			U1 0h	63376.5	14730.9
			U1 0.5h	50806	5623.24			U1 0.5h	90632	10814.9			U1 0.5h	71076.8	21058
			U1 1h	61350.7	6647.58			U1 1h	88656.9	11856			U1 1h	54429.3	15728
			U1 2h	88689.7	10077.4			U1 2h	102295	7778.35			U1 2h	70080.3	20584.1
			U1 3h	99930.1	12590.5			U1 3h	110995	11759.4			U1 3h	103856	22940
			U1 4h	123119	13054.6			U1 4h	99191	10245.6			U1 4h	83397.3	18915.1
			U1 8h	160610	14250.9			U1 8h	165259	15631			U1 8h	92199.1	19582.6
			U1 (+)	43715.4	4889.62			U1 (+)	61391.4	7279.31			U1 (+)	119354	18292.2
		xpo1-1 25°C
		N1	Name	band	background		N2	Name	band	background
			TLC1-MS2 0h	11159.7	6889.49			TLC1-MS2 0h	13680.6	7303.44
			TLC1-MS2 0.5h	17112	11076.9			TLC1-MS2 0.5h	20152.3	14828.6
			TLC1-MS2 1h	11235.9	5347.34			TLC1-MS2 1h	20215.9	12218.9
			TLC1-MS2 2h	21556.8	12112.9			TLC1-MS2 2h	18156.1	8809.89
			TLC1-MS2 3h	20840.5	9685.35			TLC1-MS2 3h	44661.2	17907.3
			TLC1-MS2 4h	25255.6	10365.9			TLC1-MS2 4h	33733.9	15680.4
			TLC1-MS2 8h	27425.9	10073.7			TLC1-MS2 8h	41405.4	15763.6
			TLC1-MS2 (+)	19315.4	9800.61			TLC1-MS2 (+)	25518.1	13596.7
			U1 0h	77909.2	6933.35			U1 0h	111431	14384
			U1 0.5h	96810.3	13443.6			U1 0.5h	155518	24854
			U1 1h	57579.7	6458.99			U1 1h	97761.9	16205.5
			U1 2h	88161.7	10988.6			U1 2h	57835.6	10736
			U1 3h	58389.2	5603.44			U1 3h	163550	25939
			U1 4h	63321.2	7282.62			U1 4h	118675	12900.1
			U1 8h	45739.4	4008.38			U1 8h	80239.2	12877.1
			U1 (+)	27996.5	3882.64			U1 (+)	44161.3	8309.29

## Sheet: Fig. 3-fig. S1G
Figure 3 - figure supplement 1G. Average number of new TLC1-MS2 foci detected by smFISH after recombination induction in wild type cells grown at various temperatures.
N - nucleus
C - cytoplasm
wild type 30°C/37°C			30°C				30°C				30°C				30°C				37°C				37°C				37°C				37°C
YV349, YV352			0 h				2 h				4 h				8 h				8 h				2 h				4 h				8 h
			MS2 (coloc)				MS2 (coloc)				MS2 (coloc)				MS2 (coloc)				MS2 (coloc)				MS2 (coloc)				MS2 (coloc)				MS2 (coloc)
		N1	N	C		N1	0	1		N1	2	5		N1	5	2			N	C			N	C			N	C			N	C
			0	0			3	3			1	0			5	0		N1	0	0		N1	1	1		N1	1	0		N1	7	0
			0	0			0	0			3.5	1.5			4.5	1.5			0	0			5	6			1	2			3	0
			0	0			3	1			5	5			1	1			1	0			3	0			7	1			2	0
			0	0			0	0			3	4			0	4			0	0			3	1			3	0			5	1
			0	0			0	0			2.5	2.5			7.5	1.5			0	0			0	2			7	3			5	5
			0	0			1	0			1	4			5	0			0	0			3	6			5	2			3	0
			0	0			0	1			3.5	3.5			6	1			0	0			4	2			3	0			10	2
			0	0			3.5	1.5			1	0			5	3			0	0			6	3			4	1			3	1
			0	0			2	2			3	6			3	1			0	0			2	0			1	1			5	4
			0	0			0.5	4.5			0	0			5	4			0	0			7	1			5	0			9	2
			0	0			3.5	2.5			1.5	0.5			2.5	3.5			0	0			2	1			4	3			2	0
			0	0			3	2			2	1			5	3			0	0			1	1			5	1			5	1
			0	0			0	0			3	4			4.5	3.5			0	0			0	1			2	0			7	0
			0	0			2	3			4.5	5.5			2	1			1	0			5	2			3	8			7	0
			0	0			3	4			4	5			4.5	2.5			0	0			7	0			7	2			6	2
			0	0			1	0			2.5	1.5			6	4			0	0			1	0			3	3			1	2
			0	0			5.5	3.5			3	3			5	1			0	0			5	1			4	5			3	5
			0	0			0.5	0.5			1	1			2.5	1.5			0	0			4	2			6	1			2	0
			0	0			1	0			5	3			1	0			0	0			2	3			2	1			9	1
			0	0			2	0			5	4			0	1			0	0			0	1			8	1			6	2
			0	0			1	4			4.5	1.5			3	2		N2	0	0			0	0			9	7		N2	2	2
			0	0			0.5	5.5			2	3			5	1			0	1		N2	3	2		N2	4	2			6	2
			0	0			2	0			2.5	2.5			4	2			0	0			0	0			1	0			3	1
			0	0			4	3			5	5			2.5	3.5			0	0			6	2			3	0			4	0
			0	0			0	2		N2	1.5	3.5			2	1			0	0			5	3			1	1			5	0
			0	0		N2	1	1			6	1		N2	3.5	1.5			0	0			3	1			6	2			2	6
			0	0			1.5	0.5			4.5	3.5			5	2			0	0			1	0			4	4			6	8
			0	0			2	4			2	1			1	3			0	0			6	0			2	0			8	3
			0	0			0	6			6	3			1	4			0	0			6	1			4	3			1	1
			0	0			1	2			2	3			1	0			0	0			4	2			3	4			7	2
		N2	0	0			0	0			0.5	1.5			2	1			0	0			0	1			1	4			7	2
			0	0			3	0			3.5	3.5			5.5	3.5			0	0			2	0			4	3			3	5
			0	0			0	1			5	2			0	9			0	0			5	2			6	8			5	3
			0	0			1	2			1	2			11	3			0	0			1	1			4	2			8	2
			0	0			1.5	1.5			2	1			5.5	1.5			1	0			2	5			5	2			4	3
			0	0			0.5	1.5			0	0			4.5	8.5			0	0			3	2			2	3			6	0
			0	0			0	0			1	4			3.5	4.5			0	0			0	3			4	1			3	1
			0	0			0	1			5.5	4.5			2.5	2.5			0	0			4	2			7	2			2	2
			0	0			1.5	2.5			2	5			5.5	0.5		N3	0	0			4	5			3	0			6	1
			0	0			1	3			1	1			2	2			0	0			2	1			6	1			5	6
			0	0			0	1			2.5	1.5			4.5	4.5			0	0			3	1		N3	4	2			4	0
			0	0			0	1			2.5	1.5			5	3			0	0		N3	0	1			3	4		N3	5	3
			0	0			1	0			2	0			2	2			1	0			6	2			2	1			3	2
			0	0			1	0			1.5	0.5			4	2			0	0			7	2			3	2			7	4
			0	0			1	1			1.5	0.5			1.5	1.5			0	0			2	0			6	2			8	1
			0	0			0	0			4	3			1	1			0	0			3	1			2	2			2	5
			0	1			5	1			0	1			2	3			0	0			6	2			6	2			6	2
			0	0			3	7			0	4			5.5	4.5			0	0			3	1			4	1			5	4
			2	1			4	0			3.5	4.5			4	2			0	1			4	0			4	5			2	3
			0	0			0	2			1	2			0	1			0	0			1	2			5	2			7	1
			0	0			1	1		N3	3	1			2	3			0	0			3	4			2	3			3	2
			0	0			1	1			7.5	5.5		N3	4	1			0	0			4	1			5	3			5	0
			0	0			1	0			6.5	6.5			3	6			0	0			0	0			7	2			1	4
			0	0			0	2			2.5	4.5			4.5	3.5							2	0			1	4			5	2
			0	0		N3	0	0			2	2			1.5	3.5							6	2			6	0			1	4
			0	0			0	0			2	0			4.5	7.5							2	4			4	4			8	6
			0	0			0.5	0.5			1.5	2.5			3.5	1.5							1	1			6	3
			0	0			0.5	1.5			2.5	4.5			1	2							0	5			3	4
			0	0			1	2			0	1			6	1
			0	0			0	0			3	1			4	1
			0	0			0	2			1	3			4	4
		N3	0	0			0	2			1	0			3	3
			0	0			1.5	1.5			0	0			3	4
			0	0			5	2			0.5	1.5			1.5	2.5
			0	0			1	2			1	2			6.5	2.5
			0	0			2	3			7	2			1.5	1.5
			0	0			1.5	1.5			3	2			4.5	3.5
			0	0			0	2			1	2			8	3
			0	0			2	2			4	0			4.5	5.5
			0	0			0	0			1	2			2.5	1.5
			0	0			0.5	2.5			0	0			3	3
			0	0			1	0			2.5	0.5			2	4
			0	0			4	7							2	7
			0	0			5	1
			0	0
			0	0
			0	0
			0	0
			0	0
			0	0
			0	0
			0	0
			0	0
			0	0
			0	0
			0	0
			0	0
			0	0
			0	0
			0	0
			0	0
