# Supplementary material for: Telomerase biogenesis requires a novel Mex67 function and a cytoplasmic association with the Sm7 complex
Source: eLife. 2020 Oct 23;9:e60000. doi: 10.7554/eLife.60000 (PMC7644208; doi:10.7554/eLife.60000)
Supplement: Figure 3—source data 1. [file elife-60000-fig3-data1.xlsx]

## Sheet: Fig. 3B,E
Figure 3B. Relative nuclear and cytoplasmic fractions of new TLC1 foci observed by smFISH following recombination induction in xpo1-1 mutants.
Figure 3E. Average number of new TLC1 foci observed by FISH following recombination induction in xpo1-1 cells.
N - nucleus
C - cytoplasm
xpo1-1 37°C			0 h				0.5 h				1 h				2 h				3 h				4 h				8 h
YV365, YV366			MS2 (coloc)				MS2 (coloc)				MS2 (coloc)				MS2 (coloc)				MS2 (coloc)				MS2 (coloc)				MS2 (coloc)
			N	C			N	C		N1	N	C		N1	N	C		N1	N	C		N1	N	C			N	C
		N1	0	0		N1	1	1			2	0			2	0			7	0			6	0		N1	5	1
			0	0			1	0			4	1			5	0			7	1			7	4			4	0
			0	0			1	0			1	1			0	0			8	0			14	4			4	0
			0	0			1	0			6	0			7	1			7	0			5	0			11	0
			0	0			0	1			2	0			2	0			3	1			11	2			17	0
			1	1			0	0			2	0			4	1			8	0			8	0			8	1
			0	0			0	0			0	0			11	0			2	1			7	1			7	0
			0	0			1	1			3	3			1	2			6	0			4	0			3	0
			0	0			0	0			3	2			5	0			9	1			5	0			8	0
			1	1			2	0			9	0			20	0			11	0			14	0			12	0
			0	0			0	0			0	0			2	0			6	1			1	0			3	2
			0	0			1	1			0	2			2	1			3	1			9	0			8	0
			0	0			1	1			4	0			0	1			7	1			15	0			7	0
			0	0			0	0			1	1			1	0			8	0			10	1			8	0
			0	0			0	0			0	1			1	0			9	0			10	0			5	5
			0	0			0	0			1	0			1	1			4	0			6	0			6	0
			0	0			2	0			5	1			3	1			5	2			5	0			2	0
			0	0			1	0			1	3			2	0			5	0			2	0			6	0
			0	0			1	0			3	1			0	1			1	0			10	0			5	0
			0	0			0	0			1	3			3	0			1	1			2	0			5	1
			0	0			1	0			4	0			3	0			5	0			3	2			9	3
		N2	0	0			1	0		N2	1	0		N2	2	0		N2	6	0			11	1			7	1
			0	0		N2	2	0			3	1			4	1			3	0		N2	7	0			13	0
			0	0			0	0			1	0			9	1			9	1			1	0			15	0
			1	1			1	0			1	3			0	0			2	0			5	0			7	1
			0	0			1	0			0	0			12	1			8	0			3	0		N2	7	0
			0	0			2	0			1	0			1	0			12	0			5	0			1	0
			0	0			2	0			3	2			5	0			6	0			8	0			5	0
			0	0			0	1			1	1			6	0			11	0			12	2			7	0
			0	0			1	0			0	0			1	3			8	0			7	0			14	1
			0	0			0	0			3	1			7	1			5	2			9	0			8	1
			0	0			1	0			1	0			6	0			5	2			5	0			8	1
			0	0			0	0			3	2			4	0			3	0			2	0			10	1
			0	0			0	0			0	2			6	0			4	2			10	0			7	0
			0	0			0	0			3	1			2	0			6	0			6	0			3	0
			0	0			1	0			2	1			0	0			4	2			10	0			15	1
			0	0			2	0			1	0			3	0			5	1			11	0			6	0
			0	0			0	0			3	4			3	1			5	0			12	0			11	0
			0	0			0	0			3	2			3	0			6	0			15	3			8	0
			0	0			0	0			5	1			2	0			4	0			19	0			10	1
			0	0			1	0			4	3			10	0			3	1			10	0			3	2
			0	0			2	0			3	2			10	0			4	0			14	0			7	0
			0	0			0	0		N3	0	2			5	0			4	0		N3	9	0			12	0
		N3	0	1			1	0			3	2		N3	4	0		N3	9	0			7	0			4	0
			0	0		N3	1	2			1	1			1	0			1	0			18	1			13	0
			0	0			0	0			3	1			1	0			9	0			10	0			11	0
			0	0			2	1			1	2			10	0			11	1			8	0			20	0
			0	0			2	1			3	1			7	0			8	0			5	1			5	0
			0	0			0	0			3	0			5	0			6	0			13	1			14	0
			0	0			0	0			3	1			6	0			3	0			13	0			7	0
			0	0			0	0			1	2			4	0			3	1			5	0		N3	3	1
			0	0			1	1			4	0			13	0			11	1			7	0			6	0
			0	1			1	0			3	1			0	0			6	0			14	0			4	1
			0	0			0	0			4	2			3	0			9	1			7	0			9	2
			0	0			2	0			1	0			0	0			7	0			1	0			6	1
			0	0			1	0			2	3			8	1			7	1			3	2			11	0
			0	0			1	0			0	1			6	0			4	2			7	0			15	0
			0	0			0	0			4	2			7	1			5	1			12	1			7	0
			0	0			0	0			0	3			5	0			3	0			11	2			7	0
			0	0			0	0			3	2			2	0			11	0			2	0			2	0
			0	0			2	0			1	1			3	1			3	1			14	0			9	0
			0	0			1	0			1	2			4	0			5	2			18	0			13	1
			0	0			1	1			1	0			1	0			4	0			4	1			6	1
							1	0			3	0			1	0			4	0							14	0
							2	0			1	3															2	1
							0	0			3	1															12	1
																											20	0
																											7	1
																											11	0
																											9	0
																											9	0
																											6	0
																											7	0

## Sheet: Fig. 3C,E
N - nucleus
C - cytoplasm
Figure 3C. Relative nuclear and cytoplasmic fractions of new TLC1 foci observed by smFISH following recombination induction in kap122 mutants.
Figure 3E. Average number of new TLC1 foci observed by FISH following recombination induction in kap122 cells.
kap122			0 h				0.5 h				1 h				2 h				3 h				4 h				8 h				16 h
YV355, YV356			MS2 (coloc)				MS2 (coloc)				MS2 (coloc)				MS2 (coloc)				MS2 (coloc)				MS2 (coloc)				MS2 (coloc)				MS2 (coloc)
			N	C			N	C			N	C			N	C			N	C			N	C			N	C			N	C
		N1	1	1		N1	0	0		N1	0	4		N1	2	3		N1	1	5		N1	1	0		N1	2	1		N1	4	2
			0	1			0	0			0	0			1	1			1	1			1	0			1	0			0	3
			0	0			0	0			0	2			2	5			0	0			0	1			1	2			3	0
			0	0			1	0			1	1			0	0			1	2			1	0			1	1			1	4
			0	0			0	0			1	0			1	2			0	4			1	0			3	1			2	3
			0	0			0	0			1	2			1	2			1	4			0	1			4	6			1	6
			0	0			0	0			0	0			0	0			0	1			0	0			0	1			0	2
			0	0			0	0			1	2			0	0			0	0			2	2			0	1			2	1
			0	0			0	0			0	0			0	1			1	1			2	4			1	1			1	2
			0	0			0	1			1	0			0	1			0	2			3	5			1	2			1	5
			0	0			0	1			1	1			1	1			0	0			0	4			3	1			3	1
			0	0			0	0			0	0			0	3			0	1			1	0			0	2			2	4
			0	0			1	1			0	2			0	1			1	1			2	1			2	0			2	1
			0	0			0	0			0	1			1	0			1	2			3	0			1	1			0	2
			0	2			0	1			0	0			1	0			0	0			3	3			1	2			1	3
			1	0			0	0			1	0			1	1			2	4			0	1			2	0			2	1
			0	0			1	1			0	1			1	2			1	1			0	0			0	2			3	2
			0	0			0	0			1	5			2	2			0	1			2	2			4	2			0	3
			0	0			0	0			1	1			1	1			0	2			2	3			1	2			4	4
			0	0			1	1		N2	0	0			0	2		N2	1	4			0	0		N2	2	0			2	1
		N2	0	0			0	0			0	2		N2	0	0			0	1		N2	0	0			1	2		N2	2	3
			0	0		N2	0	0			0	0			0	0			2	3			3	2			1	3			3	2
			0	0			0	0			0	0			0	1			0	0			3	3			4	6			1	3
			0	0			0	1			0	1			0	1			0	1			1	1			3	3			0	3
			0	0			0	0			1	1			0	0			1	1			0	3			1	0			2	4
			0	0			0	0			0	0			1	0			1	1			1	2			2	2			0	4
			0	0			0	0			0	0			1	3			1	4			1	1			1	1			1	3
			0	0			1	1			0	0			0	0			0	0			0	1			1	4			3	2
			0	1			1	0			0	3			1	1			1	4			1	0			4	0			1	3
			0	0			0	0			0	0			0	0			1	3			1	3			1	1			1	4
			0	0			0	1			0	0			1	1			2	3			1	1			1	0			3	5
			0	0			0	0			0	0			0	1			0	1			1	0			2	2			1	0
			0	0			0	1			0	0			1	0			1	1			2	0			4	2			2	1
			0	0			0	0			1	1			0	1			0	1			1	3			1	1			3	3
			1	0			1	0			1	2			2	2			1	1			0	3			1	2			4	3
			0	0			0	0			1	4			1	2			0	0			0	1			2	3			1	2
			0	0			0	0			2	1			0	0			1	1			2	0			0	2			2	2
			0	0			0	0			0	1			0	0			0	3			1	3			1	4			1	1
			0	0			1	0			0	0			0	0			1	2			0	0			3	5			3	3
			0	0			0	1			1	0			1	0			0	2			0	3			2	0			1	3
		N3	0	0			0	0			0	0			0	1			0	0			0	4		N3	3	3			4	3
			0	0			0	1			0	4			0	3			1	2		N3	2	2			2	4		N3	2	2
			0	0			0	1			0	0		N3	0	1		N3	1	1			0	2			3	4			1	2
			0	0			0	0			1	3			0	1			1	1			0	2			1	1			1	2
			0	0			0	0		N2	0	3			0	0			0	0			2	4			1	1			3	2
			0	0			0	0			0	0			0	0			2	1			1	2			1	1			2	1
			0	0		N3	0	0			0	3			0	3			0	0			4	3			1	1			1	1
			0	0			1	0			0	0			1	2			0	0			1	1			1	3			2	1
			0	0			0	0			0	0			0	1			0	3			1	2			3	3			2	4
			0	0			0	0			3	2			0	0			0	3			0	2			2	3			3	2
			0	0			0	1			1	3			1	2			1	2			4	4			4	6			1	5
			0	1			1	0			0	0			2	1			1	1			1	2			1	1			1	2
			0	0			0	0			0	3			0	0			1	2			4	4			1	0			3	2
			0	0			0	1			1	2			0	1			0	3			1	3			1	0			4	3
			0	0			0	0			0	2			0	0			0	0			3	1			1	4			1	2
			0	0			0	0			1	3			0	3			0	0			1	0			2	2			0	2
			0	0			0	0			0	1			1	2			1	1			0	2			2	0			4	1
			0	0			0	0			2	1			0	0			2	4			2	4			2	2			3	1
			0	1			0	1			0	0			0	0			0	1			1	1			0	2			1	1
			0	0			0	0			1	1			1	1			0	1			3	1
			0	0			0	0			0	3			0	0			0	0			1	1
			0	0			0	0			0	0			0	0			0	2			0	2
			0	0			0	1			0	0			1	0			1	0
			0	0			0	0
			0	0			1	0

## Sheet: Fig. 3D
Figure 3D. Northern blot quantification of untagged TLC1 and tagged TLC1-MS2 RNA transcripts following recombination induction in wild type, xpo1-1 and kap122 cells.
wild type		wild type
YV349, YV352		N1	Name	band	background		N2	Name	band	background		N3	Name	band	background
			TLC1-MS2 0h	9347.63	5773.92			TLC1-MS2 0h	11195.6	5573.2			TLC1-MS2 0h	29058.5	13695.8
kap122			TLC1-MS2 0.5h	9963.84	5540.8			TLC1-MS2 0.5h	13188.4	6316.12			TLC1-MS2 0.5h	36180.8	16876.8
YV355, YV356			TLC1-MS2 1h	10981.6	5238.91			TLC1-MS2 1h	15873.5	7858.05			TLC1-MS2 1h	40531.1	17833
			TLC1-MS2 2h	13897.6	5126.06			TLC1-MS2 2h	18836.1	8470.1			TLC1-MS2 2h	65210.6	18776
xpo1-1 37°C			TLC1-MS2 3h	18859	6468.62			TLC1-MS2 3h	18147.6	6850.29			TLC1-MS2 3h	59440.6	16025.5
YV365, YV366			TLC1-MS2 4h	24253.4	6201.36			TLC1-MS2 4h	24537.3	7302.4			TLC1-MS2 4h	76541.5	16887.5
			TLC1-MS2 8h	20127.7	6403.01			TLC1-MS2 8h	48858.7	10031.3			TLC1-MS2 8h	147140	23038
			TLC1-MS2 16h	24273	6129.36			TLC1-MS2 16h	51640.7	5536.83			TLC1-MS2 16h	171101	11646.5
			TLC1-MS2 (+)	38585.8	8505.74			TLC1-MS2 (+)	25985.9	6681.93			TLC1-MS2 (+)	78830.9	17534.3
			U1 0h	134187	23134			U1 0h	68536.8	9753.87			U1 0h	16980.8	3224.4
			U1 0.5h	123122	18510.3			U1 0.5h	81441.4	15249.6			U1 0.5h	22728.8	5173.55
			U1 1h	117545	16977.9			U1 1h	100240	17036.9			U1 1h	26139.6	5572.82
			U1 2h	71418.4	12754.2			U1 2h	102178	18697.5			U1 2h	25818.7	5636.21
			U1 3h	83882.7	14146.6			U1 3h	72475.4	13619.1			U1 3h	17673.3	3816.98
			U1 4h	72640.9	12906.5			U1 4h	71944.3	12437.9			U1 4h	15829.6	2970.03
			U1 8h	53164.9	10511.7			U1 8h	142699	26672.7			U1 8h	30882.4	5175.22
			U1 16h	60643.3	11295.5			U1 16h	150762	36450.4			U1 16h	42361.5	16021.3
			U1 (+)	132020	17849.2			U1 (+)	63965.7	8076.58			U1 (+)	15478.4	3615.02
		kap122
		N1	Name	band	background		N2	Name	band	background		N3	Name	band	background
			TLC1-MS2 0h	9406.61	5642.56			TLC1-MS2 0h	5204.02	3110.19			TLC1-MS2 0h	8831.77	6564.08
			TLC1-MS2 0.5h	10624.5	5846.54			TLC1-MS2 0.5h	6089.39	3218.53			TLC1-MS2 0.5h	7755.08	5137.69
			TLC1-MS2 1h	12607.7	6256.25			TLC1-MS2 1h	7402.93	4118.14			TLC1-MS2 1h	8893.8	5360.05
			TLC1-MS2 2h					TLC1-MS2 2h	6591.39	4863.46			TLC1-MS2 2h	13011.5	6178.49
			TLC1-MS2 3h	13391.7	4684.07			TLC1-MS2 3h	11217.7	4277.93			TLC1-MS2 3h	17486.7	8134.59
			TLC1-MS2 4h	19654.1	6143.34			TLC1-MS2 4h	14088.3	5474.71			TLC1-MS2 4h	20124.3	8614.3
			TLC1-MS2 8h					TLC1-MS2 8h	16911.7	5285.63			TLC1-MS2 8h	23991.8	9087.49
			TLC1-MS2 16h	8619.67	4023.62			TLC1-MS2 16h	14497.2	4700.28			TLC1-MS2 16h	20866.9	8697.89
			TLC1-MS2 (+)	33760.1	9640.71			TLC1-MS2 (+)	22203.3	7279.33			TLC1-MS2 (+)	22203.3	7279.33
			U1 0h	161594	23134			U1 0h	113579	19715.5			U1 0h	101931	31265.4
			U1 0.5h	170481	18510.3			U1 0.5h	110207	19942.2			U1 0.5h	98979.9	21447.2
			U1 1h	171129	16977.9			U1 1h	96964.6	23185.6			U1 1h	129211	24515
			U1 2h	144379	12754.2			U1 2h	88120.9	47515.3			U1 2h	124284	24094.8
			U1 3h	79660.3	14146.6			U1 3h	96269.7	23591.1			U1 3h	136985	29416.6
			U1 4h	110833	12906.5			U1 4h	95226.8	24538.5			U1 4h	111678	25580.5
			U1 8h	413263	10511.7			U1 8h	78863.8	17085.9			U1 8h	140583	28593.1
			U1 16h	46245.9	11295.5			U1 16h	93775.5	20904.2			U1 16h	126331	29833.5
			U1 (+)	145724	17849.2			U1 (+)	75121.2	15009.1			U1 (+)	75121.2	15009.1
		xpo1-1 37°C
		N1	Name	band	background		N2	Name	band	background		N3	Name	band	background
			TLC1-MS2 0h	8424.35	5865.16			TLC1-MS2 0h	11415.8	7733.27			TLC1-MS2 0h	2078.25	1882.11
			TLC1-MS2 0.5h	9313.7	5187.53			TLC1-MS2 0.5h	16308.9	9022.92			TLC1-MS2 0.5h	6465.68	4230.2
			TLC1-MS2 1h	15197.5	5706.13			TLC1-MS2 1h	22739	9709.25			TLC1-MS2 1h	20833.9	7968.78
			TLC1-MS2 2h	34606.7	10454.2			TLC1-MS2 2h	38068.9	9423.15			TLC1-MS2 2h	36666.2	14672.4
			TLC1-MS2 3h	48593.1	9656.05			TLC1-MS2 3h	54082.3	11195.3			TLC1-MS2 3h	54558.7	19704.7
			TLC1-MS2 4h	67541.4	12959.6			TLC1-MS2 4h	54068.1	11675.1			TLC1-MS2 4h	56624.6	19975.6
			TLC1-MS2 8h	85135.1	13608.8			TLC1-MS2 8h	84450.8	14314.7			TLC1-MS2 8h	85935	23105.9
			TLC1-MS2 (+)	21034.6	8835.36			TLC1-MS2 (+)	28538.3	11938.3			TLC1-MS2 (+)	61313.7	17092.9
			U1 0h	47380.6	5121.53			U1 0h	80524.6	7055.52			U1 0h	63376.5	14730.9
			U1 0.5h	50806	5623.24			U1 0.5h	90632	10814.9			U1 0.5h	71076.8	21058
			U1 1h	61350.7	6647.58			U1 1h	88656.9	11856			U1 1h	54429.3	15728
			U1 2h	88689.7	10077.4			U1 2h	102295	7778.35			U1 2h	70080.3	20584.1
			U1 3h	99930.1	12590.5			U1 3h	110995	11759.4			U1 3h	103856	22940
			U1 4h	123119	13054.6			U1 4h	99191	10245.6			U1 4h	83397.3	18915.1
			U1 8h	160610	14250.9			U1 8h	165259	15631			U1 8h	92199.1	19582.6
			U1 (+)	43715.4	4889.62			U1 (+)	61391.4	7279.31			U1 (+)	119354	18292.2
