# Supplementary material for: Telomerase biogenesis requires a novel Mex67 function and a cytoplasmic association with the Sm7 complex
Source: eLife. 2020 Oct 23;9:e60000. doi: 10.7554/eLife.60000 (PMC7644208; doi:10.7554/eLife.60000)
Supplement: Figure 4—figure supplement 1—source data 1. [file elife-60000-fig4-figsupp1-data1.xlsx]

## Sheet: Fig. 4-fig.S1B
Figure 4 - figure supplement 1B. Northern blot quantification of old (untagged) TLC1 RNA following recombination induction in mex67-5 cells grown at the permissive and restrictive temperatures.
mex67-5		mex67-5 37°C
YV385, YV386		N1	Name	band	background		N2	Name	band	background		N3	Name	band	background
			TLC1 0h	11540.2	4009.23			TLC1 0h	12158	4915.78			TLC1 0h	10928.7	3819.69
			TLC1 0.5h	7929.42	3351.17			TLC1 0.5h	7266.01	2560.56			TLC1 0.5h	8022.96	3418.29
			TLC1 1h	7802.74	3216.24			TLC1 1h	6236.28	2240.07			TLC1 1h	7723.18	3492.03
			TLC1 2h	5592.14	2911.7			TLC1 2h	1476.35	2586.35			TLC1 2h	5681.27	3189.87
			TLC1 4h	4207.23	2471.22			TLC1 4h	3913.96	2020.29			TLC1 4h	3971.89	2519.4
			TLC1 8h	2745.72	2398.8			TLC1 8h	2297.32	1956.74			TLC1 8h	2908.21	2310.43
			U1 0h	20139.3	2280.25			U1 0h	31082.7	3867.88			U1 0h	20539.4	2162.85
			U1 0.5h	17207.8	2088.63			U1 0.5h	21913.8	2308.66			U1 0.5h	16933.2	1942.18
			U1 1h	21087.5	1911.5			U1 1h	23768.2	1694.35			U1 1h	20955.9	2057.93
			U1 2h	22326.2	1893.25			U1 2h	25935.8	10311.2			U1 2h	22639.1	1955.02
			U1 4h	24531	2052.4			U1 4h	29224.2	1675.99			U1 4h	25162.7	2184.53
			U1 8h	30154.3	3323.9			U1 8h	32521.9	2305.27			U1 8h	31838.5	3491.16
		mex67-5 25°C
		N1	Name	band	background		N2	Name	band	background
			TLC1 0h	26177.7	6237.16			TLC1 0h	23534.8	4031.88
			TLC1 0.5h	27917.4	6238.04			TLC1 0.5h	14298.6	3510.01
			TLC1 1h	26112.5	6074.97			TLC1 1h	16038.8	2931.73
			TLC1 2h	22007	6363.47			TLC1 2h	16786.6	5684.28
			TLC1 4h	12949.6	8425.55			TLC1 4h	12235	2724.44
			TLC1 8h	5512.44	4305.93			TLC1 8h	4702.22	2695.87
			U1 0h	27345.8	2698.12			U1 0h	28307	1980.45
			U1 0.5h	26823.6	2373.01			U1 0.5h	18342.2	1791.79
			U1 1h	25591.6	2673.84			U1 1h	20887.1	1713.36
			U1 2h	26212	3618.38			U1 2h	27731.8	3159.52
			U1 4h	33210.7	5203.4			U1 4h	20798.2	1946.17
			U1 8h	18896.4	3571.97			U1 8h	21544.5	2549.86

## Sheet: Fig. 4-fig. S1C
Figure 4 - figure supplement 1C. Relative nuclear and cytoplasmic fractions of tagged TLC1-MS2 foci detected by smFISH after 4 h of recombination in mex67-5 cells grown at 25°C and 37°C.
N - nucleus
C - cytoplasm
mex67-5 25°C/37°C			25°C				37°C
YV385, YV386			4 h				4 h
			MS2 (coloc)				MS2 (coloc)
			N	C			N	C
		N1	2	1		N1	0	0
			3	1			1	0
			8	3			0	0
			8	3			0	0
			0	0			0	0
			2	0			1	0
			3	1			1	0
			7	1			0	0
			0	0			1	0
			1	0			0	0
			4	0			1	0
			1	3			0	0
			2	2			0	0
			1	3			2	0
			1	1			3	0
			3	0			0	0
			0	0			0	0
			2	0			1	0
			3	7			0	0
		N2	0	0		N2	0	0
			4	0			1	0
			5	0			0	0
			2	1			1	0
			3	0			1	0
			2	3			1	0
			0	4			0	0
			0	0			0	0
			6	6			0	0
			1	2			2	0
			2	0			0	0
			0	2			1	1
			0	4			1	0
			1	1			1	0
			1	0			0	0
			2	0			2	0
		N3	2	2			0	0
			1	0			0	0
			2	6			1	0
			1	1		N3	0	0
			3	0			0	1
			4	5			0	0
			2	1			0	0
			3	5			2	0
			1	3			2	1
			1	1			0	0
			1	0			0	0
			2	0			1	0
			6	6			0	0
			4	2			1	0
			2	7			0	0
			4	6			0	0
			2	3			1	0
			2	3			1	0
			7	2			1	0
			2	0			0	0

## Sheet: Fig. 4-fig. S1D
Figure 4 - figure supplement 1D. Average number of new TLC1-MS2 foci detected by smFISH in wild type and mex67-5 cells.
N - nucleus
C - cytoplasm			25°C			37°C			37°C			37°C			25°C				25°C			37°C			25°C
			mex67-5			mex67-5			mex67-5			mex67-5			mex67-5				wild type			wild type			wild type
mex67-5 25°C/37°C			4 h			+ 1 h			+ 2 h			+ 3 h			+ 3 h				4 h			+ 3 h			+ 3 h
YV385, YV386			MS2 (coloc)			MS2 (coloc)			MS2 (coloc)			MS2 (coloc)			MS2 (coloc)				MS2 (coloc)			MS2 (coloc)			MS2 (coloc)
		N1	3		N1	4		N1	4		N1	8		N1	7			N1	2		N1	9		N1	1
wild type 25°C/37°C			4			6			7			3			8				5			9			2
YV349, YV352			11			1			0			3			2				4			7			4
			11			1			4			7			1				1			1			7
			0			3			6			1			6				1			10			7
			2			6			3			5			1				6			7			7
			4			6			3			0			4				5			13			5
			8			5			5			3			9				0			6			4
			0			6			5			1			2				3			6			5
			1			6			2			12			7				4			9			7
			4			2			4			6			1				4			6			7
			4			3			2			2			7				0			7			2
			4			6			4			1			8				3			1			4
			4			2			0			2			5				5			8			4
			2			1			0			2			3				4			3			9
			3			6			3			4			7				2			7			2
			0			3			1			2			1				3			4			3
			2		N2	3			1		N2	1		N2	9				5			9			5
			10			2			6			3			6				5			6			8
		N2	0			5			6			1			5				8			8			9
			4			5			5			2			4				5			5			6
			5			2			1			2			4				7			7			8
			3			3			7			2			6				4			7			7
			3			6			4			2			5				1			6			5
			5			1			6			3			5				4		N2	10		N2	5
			4			1			0			3			5				4			5			3
			0			2			4			3			7				6			8			7
			12			3		N2	5			4			4				7			6			8
			3			3			1			6			8				12			3			6
			2			5			4			3			5				4			4			9
			2			4			5			4			6				5			8			3
			4			5			5			8			6				12			7			5
			2			3			3			5			5				6			5			6
			1		N3	4			5		N3	1		N3	6				4			11			4
			2			4			4			3			10			N2	3			4			6
			4			3			4			5			7				2			4			10
			1			7			8			2			12				3			8			5
			8			5			6			1			7				4			8			7
			2			3			3			11			11				0			4			12
		N3	3			6			5			0			9				10			4			4
			9			2			0			2			9				5			6			9
			3			3			4			2			13				4			11			7
			8			4			3			0			7				7			8			4
			4			6			4			4			5				4			3			8
			2			6			3			1			5				12			6			4
			1			3			1			6			6				1			9			3
			2			3			3			4			4				6			15			3
			12			4			2			5			5				1			6			6
			6			6			1			3			7				6			5			11
			9			4			3			5			7				4			13			5
			10			5			4			4			2				6						10
			5						2										2
			5						3										7
			9						1										5
			2					N3	1										5
									2										1
									4										6
									7										3
									4										4
									4										4
									4										5
									3										2
									4										5
									6										4
									1										3
									5										8
									1										4
									4										6
									7										3
									3										1
									3										4
									2
									2
									3
									4
									1
									0
									3
									3
									4
									6
									5

## Sheet: Fig. 4-fig. S1E
Figure 4 - figure supplement 1E. RNA Pol II ChIP (% of input) at the TLC1 locus normalized to the U1 locus in mex67-5 cells grown at 25°C and 37°C.
mex67-5 25°C/37°C					mex67-5
YV385, YV386					25°C			37°C
				Ab	N1 (Ct)	N2 (Ct)	N3 (Ct)	N1 (Ct)	N2 (Ct)	N3 (Ct)
		TLC1 locus	input	+	14.561	14.3688	13.59	13.8576	14.1018	13.5242
			input	-	13.2686	13.4363	13.7963	13.5902	13.5778	13.7963
			IP	+	24.0594	24.95	22.1345	23.8616	24.0237	22.5942
			IP	-	28.8059	28.7329	30.5441	28.1687	29.3932	29.12
					N1 (Ct)	N2 (Ct)	N3 (Ct)	N1 (Ct)	N2 (Ct)	N3 (Ct)
		U1 locus	input		13.7762	13.3759	12.7144	13.2279	13.2356	12.5432
			input		12.4122	12.4539	12.9576	12.4174	12.5021	12.8986
			IP		20.8022	21.343	19.4709	21.0326	20.3384	19.9595
			IP		27.5361	27.5071	30.9517	27.5815	28.3825	27.797

## Sheet: Fig. 4-fig. S1G
Figure 4 - figure supplement 1G. Quantification of the northern blot shown in F.
mex67-5 rrp6 25°C/37°C		mex67-5 rrp6 37°C
YV399, YV400		N1	Name	band	background		N2	Name	band	background		N3	Name	band	background
			TLC1-MS2 0h	369.07	308.33			TLC1-MS2 0h	287.52	255.35			TLC1-MS2 0h	253.94	224.68
			TLC1-MS2 2h	29063.4	2443			TLC1-MS2 2h	10667.7	934.47			TLC1-MS2 2h	14085.3	549.51
			TLC1-MS2 4h	41555.6	2072.08			TLC1-MS2 4h	8671.67	531.11			TLC1-MS2 4h	30052.9	1524.9
			TLC1-MS2 (+)	59978.9	1016.32			TLC1-MS2 (+)	98999.2	3486.46			TLC1-MS2 (+)	59978.9	1016.32
			U1 0h	91549.5	2128.63			U1 0h	39171.4	945.86			U1 0h	23163.8	633.95
			U1 2h	161029	10099.6			U1 2h	90939	7531.51			U1 2h	114669	12320.5
			U1 4h	193360	8854.19			U1 4h	85718.2	7832.15			U1 4h	186793	10950.8
			U1 (+)	60523.6	4057.33			U1 (+)	125335	11553			U1 (+)	60523.6	4057.33
		mex67-5 rrp6 25°C
		N1	Name	band	background		N2	Name	band	background		N3	Name	band	background
			TLC1-MS2 0h	439.89	364.44			TLC1-MS2 0h	467.48	382.98			TLC1-MS2 0h	437.9	379.74
			TLC1-MS2 2h	13389.7	469.63			TLC1-MS2 2h	8374.08	552.65			TLC1-MS2 2h	8117.89	359.28
			TLC1-MS2 4h	29415.2	688.57			TLC1-MS2 4h	11771.8	393.05			TLC1-MS2 4h	15676	452.6
			TLC1-MS2 (+)	59978.9	1016.32			TLC1-MS2 (+)	98999.2	3486.46			TLC1-MS2 (+)	59978.9	1016.32
			U1 0h	138308	5283.69			U1 0h	81200.5	2593.42			U1 0h	68375.6	2107.98
			U1 2h	111658	5727.25			U1 2h	165284	5053.31			U1 2h	100318	3052.7
			U1 4h	183368	8287.49			U1 4h	86189.3	2741.9			U1 4h	136251	5179.62
			U1 (+)	60523.6	4057.33			U1 (+)	125335	11553			U1 (+)	60523.6	4057.33

## Sheet: Fig. 4-fig. S1H
Figure 4 - figure supplement 1H. Relative nuclear and cytoplasmic fractions of tagged TLC1-MS2 foci detected by smFISH after 4 h of recombination in mex67-5 rrp6Δ cells grown at 25°C and 37°C.
N - nucleus
C - cytoplasm
mex67-5 rrp6 25°C/37°C			25°C				37°C
YV399, YV400			4 h				4 h
			MS2 (coloc)				MS2 (coloc)
			N	C			N	C
		N1	10	5		N1	3	3
			0	0			4	0
			2	1			3	0
			0	1			0	0
			1	2			1	0
			0	1			1	0
			0	2			0	0
			0	1			4	2
			1	0			2	1
			0	1			0	0
			1	0			1	0
			0	1			4	0
			5	8			2	0
			0	4			4	0
			1	1			4	2
			2	1			0	0
			4	0			4	0
			1	1			2	0
			5	3			4	0
			1	1			1	1
			2	1			1	1
			1	1			9	1
			3	0			1	1
			0	0			2	0
			0	0			3	1
			2	0			3	1
			3	2			10	3
			0	0			8	3
			0	0			5	1
			0	0			0	0
			4	3			5	0
			1	1			3	3
			3	1			1	1
			1	1			0	0
			4	4			0	1
			0	1			1	0
			1	1			0	2
			10	1			10	4
			5	4			2	2
		N2	0	0			3	1
			3	0			3	1
			2	1			0	1
			3	3			0	1
			4	3			2	0
			1	0		N2	4	2
			0	1			7	1
			2	0			0	2
			0	1			5	0
			0	1			11	0
			4	4			4	0
			0	0			0	0
			0	0			2	1
			0	4			0	0
			4	4			3	1
			0	1			1	0
			0	2			4	1
			5	5			4	0
			0	0			1	1
			0	3			0	0
			1	0			0	0
			0	0			5	1
			1	1			6	2
			1	0			2	1
			2	3			0	1
			0	1			5	1
			0	1			2	4
			1	5			3	2
			1	0			0	0
			0	1			3	5
			5	1			1	1
			3	3			3	0
			4	3			2	0
			2	2			0	0
			0	1			1	4
			2	1			0	1
			0	4			10	4
			0	2			0	1
			4	2			1	2
			6	6			2	0
			0	2			0	1
			0	0			2	0
			0	0			0	3
			4	5			4	1
			1	0			0	0
		N3	0	6			0	0
			0	0			0	1
			1	2			0	1
			2	3			2	0
			0	2			2	3
			2	0			0	1
			1	0			3	3
			0	1		N3	8	2
			0	2			2	3
			1	0			3	4
			1	5			4	3
			6	3			0	0
			10	0			2	1
			6	0			0	0
			7	1			1	1
			0	0			3	1
			2	0			8	0
			0	0			3	2
			3	3			0	0
			0	0			0	0
			1	1			10	0
			0	1			2	4
			1	1			4	4
			1	0			5	0
			0	0			0	5
			0	0			0	6
			0	0			1	1
			0	0			0	2
			8	0			1	0
			1	1			1	2
			1	5			8	3
			5	7			5	5
			4	2			4	4
							1	3
							1	1
							2	1
							6	2
							7	3
							0	1
							0	0
							0	3
							3	1
							10	1
							6	0
