# Supplementary material for: Telomerase biogenesis requires a novel Mex67 function and a cytoplasmic association with the Sm7 complex
Source: eLife. 2020 Oct 23;9:e60000. doi: 10.7554/eLife.60000 (PMC7644208; doi:10.7554/eLife.60000)
Supplement: Figure 4—figure supplement 2—source data 1. [file elife-60000-fig4-figsupp2-data1.xlsx]

## Sheet: Fig 4-fig. suppl. 2B
Figure 4 - figure supplement 2B. Average number of new TLC1-MS2 foci detected by smFISH following recombination induction in mex67-5 xpo1-1 cells grown at 25°C and 37°C.
mex67-5 xpo1-1 25°C/37°C			25°C			37°C			25°C			37°C
YV417, YV418			2 h			2 h			4 h			4 h
			MS2 (coloc)			MS2 (coloc)			MS2 (coloc)			MS2 (coloc)
		N1	4		N1	2		N1	15		N1	2
			3			0			1			0
			4			0			6			0
			4			0			3			0
			3			0			8			0
			7			0			4			0
			8			1			6			2
			2			0			7			1
			6			2			8			1
			5			0			14			2
			6			0			4			3
			7			0			4			0
			2			3			5			0
			10			1			8			0
			6			0			5			0
			5			1			4			1
			7			0			4			1
		N2	4			0			6			0
			7			0		N2	7			0
			8			0			7			0
			3			1			14		N2	0
			5			0			12			0
			5		N2	0			9			1
			4			1			10			0
			1			1			10			2
			1			1			8			1
			4			2			13			3
			7			1			3			0
			3			1			8			0
			4			0			9			0
			3			0			7			0
			6			1			8			0
			9			1			5			2
			9			1			5			1
			9			0			9			0
		N3	5			1			12			0
			6			1		N3	9			0
			7			0			11			0
			8			0			6			2
			0			0			8			1
			2			4			11			2
			1			1			7			1
			0			2			17			0
			0			2			7		N3	0
			3			1			6			2
			2		N3	0			7			2
			0			0			9			0
			7			0			14			0
			3			2			4			0
			0			1			7			1
			3			0			11			0
			6			0			9			0
						1			8			0
						1			5			1
						1			6			0
						1			7			3
						0			8			1
						1			7			1
						0						0
						0						2
						1						1
						1						1
						2						0
						0						1
						0						1
						0
						0
						1
