# Supplementary material for: Telomerase biogenesis requires a novel Mex67 function and a cytoplasmic association with the Sm7 complex
Source: eLife. 2020 Oct 23;9:e60000. doi: 10.7554/eLife.60000 (PMC7644208; doi:10.7554/eLife.60000)
Supplement: Figure 4—source data 1. [file elife-60000-fig4-data1.xlsx]

## Sheet: Fig. 4B
Figure 4B. Quantification of the northern blots shown in A.
mex67-5		mex67-5 37°C
YV385, YV386		N1	Name	band	background		N2	Name	band	background		N3	Name	band	background
			TLC1-MS2 0h	2412.62	1509.41			TLC1-MS2 0h	2489.43	1512.86			TLC1-MS2 0h	2511.83	1594.17
			TLC1-MS2 0.5h	2486.06	1678.98			TLC1-MS2 0.5h	2247.13	1362.32			TLC1-MS2 0.5h	2574.01	1738.04
			TLC1-MS2 1h	2741.15	1843.87			TLC1-MS2 1h	2460.16	1347.96			TLC1-MS2 1h	2812.98	1947.37
			TLC1-MS2 2h	2689.29	1671.47			TLC1-MS2 2h	907.15	807.07			TLC1-MS2 2h	2731.74	1736.44
			TLC1-MS2 4h	2331.32	1458.37			TLC1-MS2 4h	2581.51	1390.05			TLC1-MS2 4h	2439.1	1563.94
			TLC1-MS2 8h	2724.52	1775.98			TLC1-MS2 8h	2973.54	1642.38			TLC1-MS2 8h	2852.52	1836.37
			TLC1-MS2 (+)	11867.8	2065.71			TLC1-MS2 (+)	12283.5	1986.51			TLC1-MS2 (+)	12395.4	1839.25
			U1 0h	20139.3	2280.25			U1 0h	31082.7	3867.88			U1 0h	20539.4	2162.85
			U1 0.5h	17207.8	2088.63			U1 0.5h	21913.8	2308.66			U1 0.5h	16933.2	1942.18
			U1 1h	21087.5	1911.5			U1 1h	23768.2	1694.35			U1 1h	20955.9	2057.93
			U1 2h	22326.2	1893.25			U1 2h	25935.8	10311.2			U1 2h	22639.1	1955.02
			U1 4h	24531	2052.4			U1 4h	29224.2	1675.99			U1 4h	25162.7	2184.53
			U1 8h	30154.3	3323.9			U1 8h	32521.9	2305.27			U1 8h	31838.5	3491.16
			U1 (+)	23980.7	1937.76			U1 (+)	22137.8	1999.05			U1 (+)	22916.6	2121.8
		mex67-5 25°C
		N1	Name	band	background		N2	Name	band	background
			TLC1-MS2 0h	2640.51	1533.98			TLC1-MS2 0h	2020.73	1111.27
			TLC1-MS2 0.5h	3251.28	1731.29			TLC1-MS2 0.5h	1893.1	1246.61
			TLC1-MS2 1h	4472.79	2073.33			TLC1-MS2 1h	3486.23	1376.39
			TLC1-MS2 2h	5116.41	1978.61			TLC1-MS2 2h	4366.2	1459.02
			TLC1-MS2 4h	9571.67	1779.83			TLC1-MS2 4h	6437.4	1331.14
			TLC1-MS2 8h	9873.03	2036.45			TLC1-MS2 8h	11291.5	1859.11
			TLC1-MS2 (+)	15740.6	3137.33			TLC1-MS2 (+)	11559.3	2234.59
			U1 0h	27345.8	2698.12			U1 0h	28307	1980.45
			U1 0.5h	26823.6	2373.01			U1 0.5h	18342.2	1791.79
			U1 1h	25591.6	2673.84			U1 1h	20887.1	1713.36
			U1 2h	26212	3618.38			U1 2h	27731.8	3159.52
			U1 4h	33210.7	5203.4			U1 4h	20798.2	1946.17
			U1 8h	18896.4	3571.97			U1 8h	21544.5	2549.86
			U1 (+)	18816	1854.28			U1 (+)	16663.9	1947.17

## Sheet: Fig. 4D
Figure 4D. Average number of new TLC1-MS2 foci detected by smFISH following recombination induction in mex67-5 cells grown at 25°C and 37°C.
mex67-5 25°C/37°C			25°C			25°C			25°C			37°C			37°C			37°C
YV385, YV386			2 h			4 h			8 h			2 h			4 h			8 h
			MS2 (coloc)			MS2 (coloc)			MS2 (coloc)			MS2 (coloc)			MS2 (coloc)			MS2 (coloc)
		N1	1		N1	3		N1	7		N1	0		N1	0		N1	0
			2			4			8			0			1			1
			2			11			2			0			0			0
			2			11			1			1			0			0
			2			0			6			0			0			0
			2			2			1			0			1			0
			2			4			4			2			1			0
			3			8			9			1			0			1
			1			0			2			0			1			1
			2			1			7			0			0			0
			2			4			1			0			1			2
			3			4			7			0			0			0
			5			4			8			0			0			1
			2			4			5			0			2			1
			0			2			3			1			3			0
			0			3			7			2			0			0
			2			0			1			0			0			1
			1			2		N2	9			0			1			1
		N2	3			10			6			0			0			0
			0		N2	0			5		N2	0		N2	0		N2	1
			1			4			4			2			1			2
			2			5			4			0			0			0
			0			3			6			0			1			1
			3			3			5			0			1			1
			2			5			5			2			1			1
			5			4			5			0			0			1
			7			0			7			0			0			2
			3			12			4			0			0			0
			3			3			8			0			2			1
			1			2			5			0			0			0
			1			2			6			1			2			0
			2			4			6			1			1			2
			2			2			5			0			1			1
			3			1			6			0			0			0
			4			2			10			0			2			1
			1		N3	4			7			0			0			0
			3			1		N3	12			0			0			0
		N3	2			8			7			1			1			0
			3			2			11		N3	0		N3	0		N3	1
			3			3			9			0			1			0
			2			9			9			0			0			2
			2			3			13			2			0			0
			1			8			7			1			2			0
			1			4			5			0			3			0
			0			2			5			0			0			1
			2			1			6			1			0			0
			1			2			4			2			1			1
			4			12			5			0			0			0
			3			6			7			1			1			0
			2			9			7			0			0			0
			1			10			2			1			0			1
			3			5						0			1			0
			1			5						0			1			0
			2			9						0			1
			1			2						0			0
			2

## Sheet: Fig. 4E
Figure 4E. Average number of new TLC1-MS2 foci detected by smFISH following recombination induction in mex67-5 rrp6Δ cells grown at 25°C and 37°C.
mex67-5 rrp6 25°C/37°C			25°C			37°C			25°C			37°C
YV399, YV400			2 h			2 h			4 h			4 h
			MS2 (coloc)			MS2 (coloc)			MS2 (coloc)			MS2 (coloc)
		N1	2		N1	10		N1	15		N1	6
			5			5			0			4
			9			3			3			3
			3			0			1			0
			4			1			3			1
			2			2			1			1
			2			15			2			0
			1			0			1			6
			0			0			1			3
			4			6			1			0
			0			10			1			1
			0			4			1			4
			1			1			13			2
			5			1			4			4
			0			2			2			6
			0			1			3			0
			0			3			4			4
			2			2			2			2
			0			2			8			4
			10			2			2			2
			1			5			3			2
			5			1			2			10
			1			0			3			2
			14			1			0			2
			14			14			0			4
			11			5			2			4
			5			0			5			13
			2			3			0			11
			1			1			0			6
			1			9			0			0
		N2	3			6			7			5
			1			1			2			6
			0			6			4			2
			10			4			2			0
			2			1			8			1
			4			5			1			1
			3			3			2			2
			1			0			11			14
			0			2			9			4
			5			0		N2	0			4
			1			1			3			4
			0			1			3			1
			2			4			6			1
			3			7			7			2
			2		N2	1			1		N2	6
			1			2			1			8
			1			11			2			2
			12			3			1			5
			4			3			1			11
			2			0			8			4
			1			0			0			0
			0			3			0			3
			2			1			4			0
			0			3			8			4
			2			1			1			1
			2			0			2			5
			2			3			10			4
			4			3			0			2
			2			6			3			0
			5			6			1			0
		N3	1			2			0			6
			1			12			2			8
			3			0			1			3
			5			4			5			1
			2			0			1			6
			5			2			1			6
			0			2			6			5
			6			5			1			0
			0			1			1			8
			0			5			6			2
			1			5			6			3
			1			2			7			2
			5			2			4			0
			3			8			1			5
			3			4			3			1
			1			3			4			14
			0			3			2			1
			4			7			6			3
			0			2			12			2
			3			3			2			1
			1			8			0			2
			2			3			0			3
			2			0			9			5
			3			5			1			0
			0			5		N3	6			0
			6			7			0			1
			0			6			3			1
			4			0			5			2
			2			3			2			5
			0			3			2			1
			8			3			1			6
			4		N3	4			1		N3	10
			4			0			2			5
			6			2			1			7
			1			4			6			7
			1			6			9			0
			3			3			10			3
			6			4			6			0
			8			4			8			2
			6			1			0			4
						1			2			8
						2			0			5
						3			6			0
						3			0			0
						2			2			10
						3			1			6
						2			2			8
						3			1			5
						11			0			5
						8			0			6
						2			0			2
						0			0			2
						1			8			1
						5			2			3
						4			6			11
						4			12			10
						2			6			8
						1						4
						0						2
						2						3
						1						8
						5						10
						5						1
						1						0
						4						3
						3						4
						9						11
												6

## Sheet: Fig. 4F
Figure 4F. Average number of new TLC1-MS2 foci detected by smFISH in mex67-5 and wild type cells grown in the presence of thiolutin.
						- thiolutin			- thiolutin			- thiolutin			+ thiolutin			+ thiolutin			+ thiolutin							- thiolutin			+ thiolutin
mex67-5 +/- thiolutin			mex67-5 25°C			mex67-5 37°C			mex67-5 37°C			mex67-5 37°C			mex67-5 37°C			mex67-5 37°C			mex67-5 37°C				wild type 25°C			wild type 37°C			wild type 37°C
YV385, YV386			4 h			+ 1 h			+ 2 h			+ 3 h			+ 1 h			+ 2 h			+ 3 h				4 h			+ 3 h			+ 3 h
			MS2 (coloc)			MS2 (coloc)			MS2 (coloc)			MS2 (coloc)			MS2 (coloc)			MS2 (coloc)			MS2 (coloc)				MS2 (coloc)			MS2 (coloc)			MS2 (coloc)
wild type +/- thiolutin		N1	3		N1	4		N1	4		N1	8		N1	2		N1	4		N1	2			N1	2		N1	9		N1	5
YV349, YV352			4			6			7			3			3			1			3				5			9			10
			11			1			0			3			4			5			2				4			7			2
			11			1			4			7			0			1			1				1			1			1
			0			3			6			1			7			0			0				1			10			5
			2			6			3			5			2			0			1				6			7			6
			4			6			3			0			2			0			0				5			13			3
			8			5			5			3			2			3			2				0			6			5
			0			6			5			1			6			5			0				3			6			4
			1			6			2			12			5			3			0				4			9			2
			4			2			4			6			6			1			1				4			6			2
			4			3			2			2			3			0			3				0			7			5
			4			6			4			1			0			1			4				3			1			2
			4			2			0			2			0			1			0				5			8			1
			2			1			0			2			3			3			1				4			3			13
			3			6			3			4			2			1			0				2			7			5
			0			3			1			2			5			2			0				3			4			2
			2		N2	3			1		N2	1			1			2			3				5			9			3
			10			2			6			3			1			0			1				5			6			2
		N2	0			5			6			1			1			4			0				8			8			4
			4			5			5			2			2			3			2				5			5			3
			5			2			1			2			3			2			1				7			7			2
			3			3			7			2			2			0			0				4			7			6
			3			6			4			2			2			2			3				1			6			2
			5			1			6			3		N2	1		N2	0			0				4		N2	10		N2	7
			4			1			0			3			2			0		N2	2				4			5			4
			0			2			4			3			1			3			4				6			8			2
			12			3		N2	5			4			1			1			0				7			6			1
			3			3			1			6			2			0			1				12			3			3
			2			5			4			3			1			1			0				4			4			7
			2			4			5			4			3			2			1				5			8			4
			4			5			5			8			2			1			0				12			7			7
			2			3			3			5			0			2			1				6			5			1
			1		N3	4			5		N3	1			1			1			3				4			11			3
			2			4			4			3			2			1			2			N2	3			4			1
			4			3			4			5			1			3			1				2			4			6
			1			7			8			2			2			2			0				3			8			8
			8			5			6			1			1			1			1				4			8			6
			2			3			3			11			0			3			2				0			4			3
		N3	3			6			5			0			5			3			0				10			4			3
			9			2			0			2			3			0			1				5			6			5
			3			3			4			2			4			3			1				4			11			3
			8			4			3			0			2			0			0				7			8			3
			4			6			4			4			1			1			3				4			3			2
			2			6			3			1			2			1			0				12			6			2
			1			3			1			6			1			3			0				1			9			1
			2			3			3			4			3			3			3				6			15			3
			12			4			2			5		N3	2		N3	1			2				1			6			0
			6			6			1			3			1			1			1				6			5			6
			9			4			3			5			0			2		N3	2				4			13			4
			10			5			4			4			5			0			1				6
			5						2						4			3			2				2
			5						3						3			2			3				7
			9						1						3			5			0				5
			2					N3	1						2			2			7				5
									2						1			1			1				1
									4						4			1			0				6
									7						1			0			2				3
									4						4			1			0				4
									4						1			1			2				4
									4						2			3			6				5
									3						0			2			1				2
									4						0			0			2				5
									6						4			1			3				4
									1						4			2			1				3
									5						1			1			2				8
									1						3			3			0				4
									4						1			0			0				6
									7						2						7				3
									3												2				1
									3												3				4
									2
									2
									3
									4
									1
									0
									3
									3
									4
									6
									5
