# Supplementary material for: Telomerase biogenesis requires a novel Mex67 function and a cytoplasmic association with the Sm7 complex
Source: eLife. 2020 Oct 23;9:e60000. doi: 10.7554/eLife.60000 (PMC7644208; doi:10.7554/eLife.60000)
Supplement: Figure 5—figure supplement 1—source data 1. [file elife-60000-fig5-figsupp1-data1.xlsx]

## Sheet: Fig. 5-fig. suppl. 1C
Figure 5 - figure supplement 2C. Average number of new TLC1-MS2 foci detected by smFISH in wild type and tlc1-Sm2T cells following induction of recombination.
N - nucleus
C - cytoplasm			tlc1 Sm2T			tlc1 Sm2T			tlc1 Sm2T			tlc1 Sm2T				wild type			wild type			wild type			wild type
			1 h			2 h			3 h			4 h				1 h			2 h			3 h			4 h
tlc1 Sm2T			MS2 (coloc)			MS2 (coloc)			MS2 (coloc)			MS2 (coloc)				MS2 (coloc)			MS2 (coloc)			MS2 (coloc)			MS2 (coloc)
YV390, YV391		N1	3		N1	0		N1	1		N1	0			N1	0		N1	1		N1	5		N1	7
			3			1			0			6				0			6			4			1
wild type			0			0			1			2				0			0			1			5
YV349, YV352			2			4			4			5				0			4			1			10
			1			1			1			8				5			0			2			7
			1			2			1			8				1			0			4			5
			0			0			1			4				0			1			3			5
			2			2			1			0				0			1			8			7
			1			0			0			2				0			5			9			1
			0			6			3			2				2			4			5			9
			1			1			6			1				0			5			7			0
			0			0			1			0				2			6			0			2
			1			0			2			6				2			5			3			3
			0			1			4			3				4			0			2			7
			1			1			0			3				4			5			1			10
			4			2			2			3				3			7			7			9
		N2	2		N2	1		N2	1		N2	2				0			1			3			4
			1			1			2			2				1			9			1			6
			0			0			0			0				2			1			9			2
			1			1			2			1				1			1			7			8
			1			2			3			4				0			2			7			9
			1			0			2			0				1			5			1			6
			2			0			1			0				0			6			5			5
			1			0			2			1				4			2			5			5
			0			2			1			2				0			7			5			10
			1			1			0			1				1			2			1		N2	5
			1			2			2			1				2		N2	2			7			7
			1			1			5			5				0			2		N2	3			8
			1			3			2			1				2			6			0			3
			0			0			2			1				3			6			1			9
			1			3			3			1				1			3			6			5
			3			1			1			0				0			0			4			2
			2			3			3			0				0			3			5			7
			1			0			1			6				6			1			8			7
		N3	1		N3	3		N3	0		N3	1				3			3			6			3
			2			2			0			5				1			3			3			3
			3			0			1			2				6			2			5			0
			1			1			1			2				0			0			5			5
			0			2			3			5				0			1			6			10
			2			1			5			1				3			4			2			7
			1			1			0			4				3			4			2			2
			2			0			2			3				2			1			0			4
			2			1			3			1				2			1			3			4
			1			1			0			7				0			1			2			2
			1			1			3			1			N2	2			1			5			2
			2			3			2			1				6			2			6.5			2
			1			0			2			3				0			0			6			7
			1			1			0			3				3			6			4			1
			1			0			1			3				0			10			2			4
			1			2			1			2				1			4			1			8
																0			2			6			3
																3			2			4		N3	4
																6			2			3			13
																0			1			10			13
																3			2		N3	7			7
																1		N3	0			2			4
																0			0			7			2
																0			1			5			4
																0			2			5			7
																0			3			1			1
																2			0			6			4
																0			2			9			4
																1			2			8			1
																2			3			4			0
																3			7			7			2
																2			3			3			3
																3			5			5			9
																8			3			3			5
																2			2			2			3
																4			4			3			4
																0			0			4			3
																3			3			6.5			0
																0			1						3
																1			11
																0			6
															N3	3
																2
																3
																0
																1
																1
																0
																3
																3
																2
																0
																1
																2
																2
																0
																3
																1
																1
																1
																0
																0
																4
																1
																2
																0
																1
																0
																1
																1
																6
																2
																0
																2
																7
																3
																0
																3
																3
																1
																7
																7
																1
																1
																5
																0

## Sheet: Fig. 5-fig. suppl. 1E
Figure 5 - figure supplement 1E. Average number of new TLC1-MS2 foci detected by smFISH in tlc1-Sm2T xpo1-1 cells grown at 25°C and 37°C following induction of recombination.
N - nucleus
C - cytoplasm
tlc1 Sm2T xpo1-1 25°C/37°C			25°C			25°C			25°C			37°C			37°C			37°C
YV403, YV404			2 h			3 h			4 h			2 h			3 h			4 h
			MS2 (coloc)			MS2 (coloc)			MS2 (coloc)			MS2 (coloc)			MS2 (coloc)			MS2 (coloc)
		N1	3		N1	0		N1	0		N1	3		N1	8		N1	1
			0			1			0			0			13			1
			3			1			12			1			1			0
			0			2			0			6			5			2
			0			0			1			2			1			2
			1			0			1			1			2			0
			0			0			2			2			0			3
			0			0			0			3			7			0
			5			0			0			1			1			5
			0			0			2			7			1			2
			0			0			1			1			13			1
			0			0			0			0			0			0
			0			0			0			0			4			0
			0			5			0			2			0			3
			1			3			0			2			9			3
			0			0			0			0			5			5
			1			0			0			0			1			7
			0			2			6			4			2			1
			0			0			1			5			3			2
			0			2			4			0			0			2
			1			0			0			1			0			6
			1			0			2			0			1			2
			5			1			0			1			1			2
			1			2			0			1			1			2
			0			4			0			1			8			6
			9			3			0			3			0			3
			0			3			0			2		N2	0			0
			0			1			0			0			1			1
			0			0		N2	0			0			0			5
			0		N2	0			6		N2	0			0			0
			0			0			4			5			0			3
			0			0			0			0			0			5
			0			0			0			8			4			0
			0			1			0			7			3		N2	4
		N2	1			0			7			1			1			1
			0			0			2			3			3			4
			1			0			1			2			0			3
			2			0			0			2			2			5
			7			0			0			1			0			2
			0			0			1			1			7			2
			0			0			0			0			7			6
			0			1			0			8			1			1
			0			8			0			1			6			4
			0			1			0			2			3			10
			0			0			9			1			0			2
			0			0			2			7			5			0
			0			0			2			1			0			4
			0			0			0			4			0			0
			0			1			0			5			1			0
			1			6			1			6			5			3
			8			0			3			0		N3	1			6
			1			0			0			0			1			2
			2			0			0			3			5			2
			2			0			0			0			2			1
			1			4		N3	0			0			1			9
			2			6			0			1			1			2
			1		N3	1			0		N3	0			5			9
			2			0			2			0			2			6
			0			0			3			1			1			3
			0			0			0			2			1			3
			0			1			0			4			8			7
			0			2			0			3			2			4
			0			1			1			1			6		N3	2
			0			0			2			0			3			6
			0			2			0			0			1			1
			0			1			1			1			4			1
		N3	0			2			3			3			4			2
			0			0			0			4			5			7
			3			0			0			1			6			3
			1			0			2			5			0			4
			0			3			1			4			1			3
			0			0			1			5						0
			0			0			2			3						4
			0			0			0			3						5
			0			1			0			2						16
			0			3			4			2						5
			1			2			0			2						0
			0			5			0			7						2
			0			0			0			7						13
			0			0			0			2						4
			0			0			0			3						2
			0			0						0						0
			0			0						0						0
			0			0												5
			0			0												2
			0															0
			0															0
			0															4
			0															5
			0															4
			0															4
			0															12
			0															6
			0
			1
			1
			2
			0
			0
			0
			0
			0
			0
