# Supplementary material for: Telomerase biogenesis requires a novel Mex67 function and a cytoplasmic association with the Sm7 complex
Source: eLife. 2020 Oct 23;9:e60000. doi: 10.7554/eLife.60000 (PMC7644208; doi:10.7554/eLife.60000)
Supplement: Figure 5—source data 1. [file elife-60000-fig5-data1.xlsx]

## Sheet: Fig. 5B
Figure 5B. Relative nuclear and cytoplasmic fractions of tagged TLC1-MS2 foci detected by smFISH in wild type and tlc1-Sm2T cells after 1 h and 4 h of recombination.
N - nucleus
C - cytoplasm			tlc1 Sm2T				tlc1 Sm2T				wild type				wild type
			1 h				4 h				1 h				4 h
tlc1 Sm2T			MS2 (coloc)				MS2 (coloc)				MS2 (coloc)				MS2 (coloc)
YV390, YV391			N	C			N	C			N	C		N1	2	5
		N1	0	3		N1	0	0		N1	0	0			1	0
wild type			0	3			4	2			0	0			3.5	1.5
YV349, YV352			0	0			2	0			0	0			5	5
			1	1			0	5			0	0			3	4
			1	0			0	8			1.5	3.5			2.5	2.5
			1	0			2	6			0.5	0.5			1	4
			0	0			0	4			0	0			3.5	3.5
			0	2			0	0			0	0			1	0
			0	1			1	1			0	0			3	6
			0	0			0	2			2	0			0	0
			0	1			1	0			0	0			1.5	0.5
			0	0			0	0			0.5	1.5			2	1
			1	0			1	5			0	2			3	4
			0	0			0	3			2.5	1.5			4.5	5.5
			1	0			1	2			2.5	1.5			4	5
			0	4			0	3			2	1			2.5	1.5
		N2	0	2		N2	2	0			0	0			3	3
			0	1			1	1			0	1			1	1
			0	0			0	0			1	1			5	3
			0	1			1	0			1	0			5	4
			1	0			1	3			0	0			4.5	1.5
			1	0			0	0			0	1			2	3
			1	1			0	0			0	0			2.5	2.5
			0	1			1	0			1	3			5	5
			0	0			1	1			0	0		N2	1.5	3.5
			0	1			1	0			0	1			6	1
			0	1			1	0			1	1			4.5	3.5
			0	1			2	3			0	0			2	1
			1	0			0	1			1.5	0.5			6	3
			0	0			0	1			1.5	1.5			2	3
			1	0			0	1			0.5	0.5			0.5	1.5
			0	3			0	0			0	0			3.5	3.5
			0	2			0	0			0	0			5	2
			0	1			2	4			3	3			1	2
		N3	1	0		N3	1	0			2	1			2	1
			0	2			0	5			0	1			0	0
			1	2			1	1			3.5	2.5			1	4
			0	1			2	0			0	0			5.5	4.5
			0	0			0	5			0	0			2	5
			1	1			0	1			1	2			1	1
			1	0			0	4			1	2			2.5	1.5
			1	1			0	3			2	0			2.5	1.5
			0	2			1	0			0.5	1.5			2	0
			0	1			0	7			0	0			1.5	0.5
			0	1			0	1		N2	0.5	1.5			1.5	0.5
			1	1			1	0			2.5	3.5			4	3
			0	1			0	3			0	0			0	1
			0	1			0	3			0	3			0	4
			0	1			1	2			0	0			3.5	4.5
			0	1			0	2			0.5	0.5			1	2
											0	0		N3	3	1
											1.5	1.5			7.5	5.5
											3	3			6.5	6.5
											0	0			2.5	4.5
											0.5	2.5			2	2
											0	1			2	0
											0	0			1.5	2.5
											0	0			2.5	4.5
											0	0			0	1
											0	0			3	1
											1	1			1	3
											0	0			1	0
											0.5	0.5			0	0
											1	1			0.5	1.5
											2	1			1	2
											0.5	1.5			7	2
											0	3			3	2
											2	6			1	2
											1	1			4	0
											0.5	3.5			1	2
											0	0			0	0
											3	0			2.5	0.5
											0	0
											1	0
											0	0
						N3				N3	0	3
											2	0
											0.5	2.5
											0	0
											1	0
											0	1
											0	0
											0.5	2.5
											0.5	2.5
											2	0
											0	0
											1	0
											1	1
											2	0
											0	0
											0.5	2.5
											0.5	0.5
											0	1
											0.5	0.5
											0	0
											0	0
											3	1
											1	0
											0.5	1.5
											0	0
											1	0
											0	0
											0	1
											1	0
											4	2
											2	0
											0	0
											0.5	1.5
											1.5	5.5
											3	0
											0	0
											0	3
											0	3
											1	0
											1.5	5.5
											0.5	6.5
											0	1
											0	1
											1.5	3.5
											0	0

## Sheet: Fig. 5D
Figure 5D. Quantification of the tagged TLC1-MS2 RNA from the MS2-specific northern blot shown in C.
wild type		wild type
YV349, YV352		N1	Name	band	background		N2	Name	band	background		N3	Name	band	background
			TLC1-MS2 0h	9347.63	5773.92			TLC1-MS2 0h	11195.6	5573.2			TLC1-MS2 0h	29058.5	13695.8
tlc1 Sm2T			TLC1-MS2 0.5h	9963.84	5540.8			TLC1-MS2 0.5h	13188.4	6316.12			TLC1-MS2 0.5h	36180.8	16876.8
YV390, YV391			TLC1-MS2 1h	10981.6	5238.91			TLC1-MS2 1h	15873.5	7858.05			TLC1-MS2 1h	40531.1	17833
			TLC1-MS2 2h	13897.6	5126.06			TLC1-MS2 2h	18836.1	8470.1			TLC1-MS2 2h	65210.6	18776
			TLC1-MS2 3h	18859	6468.62			TLC1-MS2 3h	18147.6	6850.29			TLC1-MS2 3h	59440.6	16025.5
			TLC1-MS2 4h	24253.4	6201.36			TLC1-MS2 4h	24537.3	7302.4			TLC1-MS2 4h	76541.5	16887.5
			TLC1-MS2 8h	20127.7	6403.01			TLC1-MS2 8h	48858.7	10031.3			TLC1-MS2 8h	147140	23038
			TLC1-MS2 16h	24273	6129.36			TLC1-MS2 16h	51640.7	5536.83			TLC1-MS2 16h	171101	11646.5
			TLC1-MS2 (+)	38585.8	8505.74			TLC1-MS2 (+)	25985.9	6681.93			TLC1-MS2 (+)	78830.9	17534.3
			U1 0h	134187	23134			U1 0h	68536.8	9753.87			U1 0h	16980.8	3224.4
			U1 0.5h	123122	18510.3			U1 0.5h	81441.4	15249.6			U1 0.5h	22728.8	5173.55
			U1 1h	117545	16977.9			U1 1h	100240	17036.9			U1 1h	26139.6	5572.82
			U1 2h	71418.4	12754.2			U1 2h	102178	18697.5			U1 2h	25818.7	5636.21
			U1 3h	83882.7	14146.6			U1 3h	72475.4	13619.1			U1 3h	17673.3	3816.98
			U1 4h	72640.9	12906.5			U1 4h	71944.3	12437.9			U1 4h	15829.6	2970.03
			U1 8h	53164.9	10511.7			U1 8h	142699	26672.7			U1 8h	30882.4	5175.22
			U1 16h	60643.3	11295.5			U1 16h	150762	36450.4			U1 16h	42361.5	16021.3
			U1 (+)	132020	17849.2			U1 (+)	63965.7	8076.58			U1 (+)	15478.4	3615.02
		tlc1 Sm2T
		N1	Name	band	background		N2	Name	band	background		N3	Name	band	background
			TLC1-MS2 0h	8357.71	6805.52			TLC1-MS2 0h	9477	7119			TLC1-MS2 0h	7927	5996
			TLC1-MS2 0.5h	13802.2	8132.14			TLC1-MS2 0.5h	11922	7976			TLC1-MS2 0.5h	13171	7717
			TLC1-MS2 1h	12494.9	6927.52			TLC1-MS2 1h	13922	6876			TLC1-MS2 1h	11798	6503
			TLC1-MS2 2h	11410	6773.36			TLC1-MS2 2h	10946	6355			TLC1-MS2 2h	11029	6402
			TLC1-MS2 3h	17441.4	8270.85			TLC1-MS2 3h	14863	9126			TLC1-MS2 3h	16823	8367
			TLC1-MS2 4h	16861.5	7950.4			TLC1-MS2 4h	13421	8927			TLC1-MS2 4h	16558	6392
			TLC1-MS2 8h	24038.8	8274.94			TLC1-MS2 8h	14343	7986			TLC1-MS2 8h	22859	7830
			TLC1-MS2 16h	18151.9	7491.96			TLC1-MS2 16h	12965	6984			TLC1-MS2 16h	19125	7927
			TLC1-MS2 (+)	66834.5	21703.3			TLC1-MS2 (+)	63177	25743			TLC1-MS2 (+)	63177	25743
			TLC1-MS2 (+)	66966.8	18552.7			TLC1-MS2 (+)	59096	21454			TLC1-MS2 (+)	59096	21454
			U1 0h	112394	13244.2			U1 0h	127556	15776			U1 0h	110928	12836
			U1 0.5h	196311	18718.5			U1 0.5h	185336	19008			U1 0.5h	192049	17362
			U1 1h	73439	9636.42			U1 1h	69887	8986			U1 1h	69473	9473
			U1 2h	54756.3	8190.32			U1 2h	53998	8556			U1 2h	55271	7938
			U1 3h	76393.6	10407.3			U1 3h	73413	11983			U1 3h	78109	10389
			U1 4h	72089.2	10097			U1 4h	68099	10873			U1 4h	74619	9811
			U1 8h	115448	11807.5			U1 8h	72766	12118			U1 8h	120483	12104
			U1 16h	85887.8	8894.31			U1 16h	78443	9112			U1 16h	83171	9583
			U1 (+)	122098	16533			U1 (+)	134006	17664			U1 (+)	134006	17664
			U1 (+)	108046	16289.2			U1 (+)	110844	17934			U1 (+)	110844	17934

## Sheet: Fig. 5F
Figure 5F. Quantification of the northern blot shown in CE.
tlc1 Sm2T xpo1-1 25°C/37°C		tlc1 Sm2T xpo1-1 37°C
YV403, YV404		N1	Name	band	background		N2	Name	band	background		N3	Name	band	background
			TLC1-MS2 0h	396.53	327.67			TLC1-MS2 0h	1839.2	1621.53			TLC1-MS2 0h	1736.71	1543.78
			TLC1-MS2 1h	1118.71	214.27			TLC1-MS2 1h	19882.1	3976.18			TLC1-MS2 1h	10293.1	4193.74
			TLC1-MS2 2h	4004.91	283.59			TLC1-MS2 2h	39881.3	6628.25			TLC1-MS2 2h	38671.5	7152.04
			TLC1-MS2 3h	2930.06	361.91			TLC1-MS2 3h	52488.6	6728.41			TLC1-MS2 3h	53918.8	6328.96
			TLC1-MS2 4h	19705.8	628.69			TLC1-MS2 4h	75780.4	7161.01			TLC1-MS2 4h	72830.1	6816.28
			TLC1-MS2 (+)	49345.1	811.4			TLC1-MS2 (+)	49345.1	811.4			TLC1-MS2 (+)	49345.1	811.4
			TLC1-MS2 (+)	74538.9	2280.2			TLC1-MS2 (+)	74538.9	2280.2			TLC1-MS2 (+)	74538.9	2280.2
			U1 0h	35193.1	620.16			U1 0h	92574.2	8701.84			U1 0h	88693.3	9284.39
			U1 1h	12687.8	314.97			U1 1h	87710.5	10430.3			U1 1h	84274.1	9729.1
			U1 2h	30550.7	624.35			U1 2h	99534.5	9699.33			U1 2h	96039.5	10029.4
			U1 3h	17993.4	423.32			U1 3h	108577	11028.5			U1 3h	101843	107363
			U1 4h	115243	2083.23			U1 4h	115150	10441.4			U1 4h	107831	10226.9
			U1 (+)	43770.3	2860.19			U1 (+)	43770.3	2860.19			U1 (+)	43770.3	2860.19
			U1 (+)	106875	6043.64			U1 (+)	106875	6043.64			U1 (+)	106875	6043.64
		tlc1 Sm2T xpo1-1 25°C
		N1	Name	band	background		N2	Name	band	background
			TLC1-MS2 0h	319.59	232.26			TLC1-MS2 0h	1518.64	1746.7
			TLC1-MS2 1h	741.21	434.34			TLC1-MS2 1h	4002.5	1976.06
			TLC1-MS2 2h	991.31	296.58			TLC1-MS2 2h	10622.8	3160.06
			TLC1-MS2 3h	1413.89	264.85			TLC1-MS2 3h	21940.2	3894.01
			TLC1-MS2 4h	3670.64	508.93			TLC1-MS2 4h	30959.3	6725.57
			TLC1-MS2 (+)	50525.8	1607.33			TLC1-MS2 (+)	50525.8	1607.33
			TLC1-MS2 (+)	85384.4	4004.33			TLC1-MS2 (+)	85384.4	4004.33
			U1 0h	21055.3	417.43			U1 0h	118037	9415.95
			U1 1h	69339.9	944.14			U1 1h	112748	9003.18
			U1 2h	20652.6	395.43			U1 2h	87554.6	7258.42
			U1 3h	19607.2	392.49			U1 3h	86812.5	6765.79
			U1 4h	37802.9	708.49			U1 4h	95222.9	9989.72
			U1 (+)	63430.1	4230.01			U1 (+)	63430.1	4230.01
			U1 (+)	108765	9740.53			U1 (+)	108765	9740.53

## Sheet: Fig. 5G
Figure 5G. Relative nuclear and cytoplasmic fractions of tagged TLC1-MS2 foci detected by smFISH in tlc1-Sm2T xpo1-1 cells grown at 25°C and 37°C after 4 h of recombination.
N - nucleus
C - cytoplasm
			25°C				37°C
tlc1 Sm2T xpo1-1 25°C/37°C			4 h				4 h
YV403, YV404			MS2 (coloc)				MS2 (coloc)
			N	C			N	C
		N1	0	0		N1	1	0
			0	0			1	0
			6	6			0	0
			0	0			2	0
			1	0			2	0
			0	1			0	0
			0	2			3	0
			0	0			0	0
			0	0			4	1
			0	2			2	0
			0	1			1	0
			0	0			0	0
			0	0			0	0
			0	0			1	2
			0	0			1	2
			0	0			3	2
			0	0			6	1
			2	4			1	0
			0	1			2	0
			2	2			0	2
							4	2
			0	2			1	1
			0	0			0	2
			0	0			2	0
			0	0			6	0
			0	0			2	1
			0	0			0	0
			0	0			1	0
		N2	0	0			3	2
			3	3			0	0
			2	2			2	1
			0	0			4	1
			0	0			0	0
			0	0		N2	3	1
			0	7			1	0
			0	2			4	0
			0	1			1	2
			0	0			2	3
			0	0			2	0
			1	0			2	0
			0	0			4	2
			0	0			1	0
			0	0			3	1
			0	0			10	0
			1	8			2	0
			1	1			0	0
			0	2			0	4
			0	0			0	0
			0	0			0	0
			0	1			1	2
			1	2			2	4
			0	0			0	2
			0	0			1	1
			0	0			1	0
		N3	0	0			6	3
			0	0			1	1
			0	0			6	3
			0	2			6	0
			0	3			2	1
			0	0			2	1
			0	0			5	2
			0	0			3	1
			0	1		N3	0	2
			0	2			5	1
			0	0			0	1
			0	1			1	0
			2	1			1	1
			0	0			6	1
			0	0			1	2
			1	1			1	3
			1	0			2	1
			0	1			0	0
			2	0			2	2
			0	0			4	1
			0	0			8	8
			2	2			3	2
			0	0			0	0
			0	0			2	0
			0	0			12	1
			0	0			3	1
			0	0			2	0
							0	0
							0	0
							4	1
							2	0
							0	0
							0	0
							2	2
							4	1
							4	0
							4	0
							10	2
							5	1
